# Supplementary material for: Genome sequencing reveals the role of rare genomic variants in Chinese patients with symptomatic intracranial atherosclerotic disease
Source: HighWire-hosted journal article supplement (doi:10.1136/svn-2021-001157), 2021-12-08
Supplement: svn-2021-001157supp001_data_supplement.pdf [file svn-2021-001157supp001_data_supplement.pdf]

|    |                                                                                            |    |
|----|--------------------------------------------------------------------------------------------|----|
| 1  | <b>Shi <i>et al.</i> Genome Sequencing Reveals the Role of Rare Genomic Variants in</b>    |    |
| 2  | <b>Chinese Patients with Symptomatic Intracranial Atherosclerotic Disease</b>              |    |
| 3  |                                                                                            |    |
| 4  | <b>SUPPLEMENTAL MATERIALS</b>                                                              |    |
| 5  | eTable 1. Genes related to stroke or other stroke subtypes in monogenic traits.....        | 2  |
| 6  | eTable 2. Primers for the SNVs/ InDels and the balanced translocation validation by Sanger |    |
| 7  | sequencing .....                                                                           | 12 |
| 8  | eTable 3. Frequency in public databases and prediction results of 59 rare SNVs and InDels  | 15 |
| 9  | eTable 4. The VRFs profile for patients with VRFs-related variants .....                   | 24 |
| 10 | eTable 5. Rare aneuploidies /CNVs and structural rearrangements in eight symptomatic       |    |
| 11 | ICAD patients .....                                                                        | 27 |
| 12 | eTable 6. Other CNVs and structural rearrangements detected in this cohort .....           | 28 |
| 13 | eTable 7. Gene enrichment analysis for the candidate variants involved genes.....          | 29 |
| 14 |                                                                                            |    |
| 15 |                                                                                            |    |
| 16 |                                                                                            |    |

1 **eTable 1. Genes related to stroke or other stroke subtypes in monogenic traits**

| No. | Cytogenetic location | Inheritance | OMIM(#)                                                                                                                                                                                                                                         | Gene            | Category | Reference (PMID)   |
|-----|----------------------|-------------|-------------------------------------------------------------------------------------------------------------------------------------------------------------------------------------------------------------------------------------------------|-----------------|----------|--------------------|
| 1   | 17q25                | AD/AR       | {Moyamoya disease 2, susceptibility to}, 607151 (3)                                                                                                                                                                                             | <i>RNF213</i>   | 2        | 32440785; 23010677 |
| 2   | 19p13.2              | AD          | Hypercholesterolemia, familial, 1, 143890 (3); LDL cholesterol level QTL2, 143890 (3)                                                                                                                                                           | <i>LDLR</i>     | 1.2      | 27809445           |
| 3   | 2p24                 | AR/AD       | Hypobetalipoproteinemia, 615558 (3); Hypercholesterolemia, familial, 2, 144010 (3)                                                                                                                                                              | <i>APOB</i>     | 1.2      | 27809445           |
| 4   | 1p32.3               | AD          | Hypercholesterolemia, familial, 3, 603776 (3); {Low density lipoprotein cholesterol level QTL 1}, 603776 (3)                                                                                                                                    | <i>PCSK9</i>    | 1.2      | 27809445           |
| 5   | 1p36-p35             | AR          | Hypercholesterolemia, familial, 4, 603813 (3)                                                                                                                                                                                                   | <i>LDLRAP1</i>  | 1.2      | 27809445           |
| 6   | 2p21                 | AR          | Sitosterolemia 2, 618666 (3)                                                                                                                                                                                                                    | <i>ABCG5</i>    | 1.2      | 27809445           |
| 7   | 2p21                 | AR          | {Gallbladder disease 4}, 611465 (3); Sitosterolemia 1, 210250 (3)                                                                                                                                                                               | <i>ABCG8</i>    | 1.2      | 27809445           |
| 8   | 10q23.31             | AR          | Wolman disease, 278000 (3); Cholesteryl ester storage disease, 278000 (3)                                                                                                                                                                       | <i>LIPA</i>     | 1.2      | 27809445           |
| 9   | 2q33-qter            | AR          | Cerebrotendinous xanthomatosis, 213700 (3)                                                                                                                                                                                                      | <i>CYP27A1</i>  | 1.2      | 27809445           |
| 10  | NA                   | AD          | {Coronary artery disease, autosomal dominant, 2}; Tooth agenesis, selective, 7,616724(3)                                                                                                                                                        | <i>LRP6</i>     | 1.2      | 27809445           |
| 11  | 19q13.2              | AR          | Hyperlipoproteinemia, type Ib, 207750 (3)                                                                                                                                                                                                       | <i>APOC2</i>    | 1.2      | 27809445           |
| 12  | 16p13.3              | AR          | Lipase deficiency, combined, 246650 (3)                                                                                                                                                                                                         | <i>LMF1</i>     | 1.2      | 27809445           |
| 13  | 11q23                | AD          | {Hypertriglyceridemia, susceptibility to}, 145750 (3); Hyperchylomicronemia, late-onset, 144650 (3)                                                                                                                                             | <i>APOA5</i>    | 1.2      | 27809445           |
| 14  | 8q24.3               | AR          | Hyperlipoproteinemia, type 1D, 615947 (3)                                                                                                                                                                                                       | <i>GPIHBP1</i>  | 1.2      | 27809445           |
| 15  | 1q22-q23             | NA          | {Hyperlipidemia, familial combined, susceptibility to}, 602491 (3)                                                                                                                                                                              | <i>USF1</i>     | 1.2      | 27809445           |
| 16  | 15q21.3              | AR/AD       | [High density lipoprotein cholesterol level QTL 12], 612797 (3); Hepatic lipase deficiency, 614025 (3); {Diabetes mellitus, noninsulin-dependent}, 125853 (3)                                                                                   | <i>HL</i>       | 1.2      | 27809445           |
| 17  | 3p25                 | AR/AD       | [Obesity, resistance to] (3); Carotid intimal medial thickness 1, 609338 (3); {Diabetes, type 2}, 125853 (3); Insulin resistance, severe, digenic, 604367 (3); Obesity, severe, 601665 (3); Lipodystrophy, familial partial, type 3, 604367 (3) | <i>PPARG</i>    | 1.2      | 27809445           |
| 18  | 1p36.22              | NA          | NA                                                                                                                                                                                                                                              | <i>TNFRSF1B</i> | 1.2      | 27809445           |
| 19  | 8p22                 | AR/AD       | Lipoprotein lipase deficiency, 238600 (3); [High density lipoprotein cholesterol level QTL 11], 238600 (3); Combined hyperlipidemia, familial, 144250 (3)                                                                                       | <i>LPL</i>      | 1.2      | 27809445           |
| 20  | 15q21.3              | AR/AD       | [High density lipoprotein cholesterol level QTL 12], 612797 (3); Hepatic lipase deficiency, 614025 (3); {Diabetes mellitus, noninsulin-dependent}, 125853 (3)                                                                                   | <i>LIPC</i>     | 1.2      | 27809445           |
| 21  | 11q23                | AD          | Hypoalphalipoproteinemia, primary, 2, with or without corneal clouding, 618463 (3); Amyloidosis, 3 or more types, 105200 (3), Autosomal dominant; ApoA-I and apoC-III deficiency, combined, 618463 (3)                                          | <i>APOA1</i>    | 1.2      | 27809445           |

|    |             |       |                                                                                                                                                                                                                                                                                                                                                                                       |                |     |          |
|----|-------------|-------|---------------------------------------------------------------------------------------------------------------------------------------------------------------------------------------------------------------------------------------------------------------------------------------------------------------------------------------------------------------------------------------|----------------|-----|----------|
| 22 | 19q13.2     | AR/AD | Hyperlipoproteinemia, type III, 617347 (3); {Coronary artery disease, severe, susceptibility to}, 617347 (3); {?Alzheimer disease, protection against, due to APOE3-Christchurch}, 607822 (3); Lipoprotein glomerulopathy, 611771 (3); Sea-blue histiocyte disease, 269600 (3); {?Macular degeneration, age-related}, 603075 (3), Autosomal dominant; Alzheimer disease 2, 104310 (3) | <i>APOE</i>    | 1.2 | 27809445 |
| 23 | 2p23.3      | NA    | [Fasting plasma glucose level QTL 5],613463                                                                                                                                                                                                                                                                                                                                           | <i>GCKR</i>    | 1.2 | 24879641 |
| 24 | 12p13       | AR/AD | Pseudohypoaldosteronism, type IIC, 614492 (3); Neuropathy, hereditary sensory and autonomic, type II, 201300 (3)                                                                                                                                                                                                                                                                      | <i>WNK1</i>    | 1.1 | 31577254 |
| 25 | 17q21-q22   | AD    | Pseudohypoaldosteronism, type IIB, 614491 (3)                                                                                                                                                                                                                                                                                                                                         | <i>WNK4</i>    | 1.1 | 31577254 |
| 26 | 12p12.2     | AD    | Hypertension and brachydactyly syndrome, 112410 (3)                                                                                                                                                                                                                                                                                                                                   | <i>PDE3A</i>   | 1.1 | 31577254 |
| 27 | 8q21        | AR/AD | Adrenal hyperplasia, congenital, due to 11-beta-hydroxylase deficiency, 202010 (3); Aldosteronism, glucocorticoid-remediable, 103900 (3)                                                                                                                                                                                                                                              | <i>CYP11B1</i> | 1.1 | 31577254 |
| 28 | 5q31        | AR/AD | Pseudohypoaldosteronism, type IID, 614495 (3)                                                                                                                                                                                                                                                                                                                                         | <i>KLHL3</i>   | 1.1 | 31577254 |
| 29 | 2q36        | AD    | Pseudohypoaldosteronism, type IIE, 614496 (3)                                                                                                                                                                                                                                                                                                                                         | <i>CUL3</i>    | 1.1 | 31577254 |
| 30 | 4q31.1      | AD    | Pseudohypoaldosteronism type I, autosomal dominant, 177735 (3); Hypertension, early-onset, autosomal dominant, with exacerbation in pregnancy, 605115 (3)                                                                                                                                                                                                                             | <i>NR3C2</i>   | 1.1 | 31577254 |
| 31 | 16p13-p12   | AR/AD | Bronchiectasis with or without elevated sweat chloride 1, 211400 (3); Pseudohypoaldosteronism, type I, 264350 (3), Autosomal recessive; Liddle syndrome 1, 177200 (3), Autosomal dominant                                                                                                                                                                                             | <i>SCNNIB</i>  | 1.1 | 31577254 |
| 32 | 16p13-p12   | AR/AD | Bronchiectasis with or without elevated sweat chloride 3, 613071 (3); Liddle syndrome 2, 618114 (3), Autosomal dominant; Pseudohypoaldosteronism, type I, 264350 (3)                                                                                                                                                                                                                  | <i>SCNNIG</i>  | 1.1 | 31577254 |
| 33 | 16q22       | AR    | Apparent mineralocorticoid excess, 218030 (3)                                                                                                                                                                                                                                                                                                                                         | <i>HSD11B2</i> | 1.1 | 31577254 |
| 34 | 10q24.3     | AR    | 17-alpha-hydroxylase/17,20-lyase deficiency, 202110 (3); 17,20-lyase deficiency, isolated, 202110 (3)                                                                                                                                                                                                                                                                                 | <i>CYP17A1</i> | 1.1 | 31577254 |
| 35 | 12p13       | AR/AD | Pseudohypoaldosteronism, type I, 264350 (3); ?Liddle syndrome 3, 618126 (3); Bronchiectasis with or without elevated sweat chloride 2, 613021 (3)                                                                                                                                                                                                                                     | <i>SCNNIA</i>  | 1.1 | 31577254 |
| 36 | 12q24.2     | AR/AD | {Diabetes mellitus, insulin-dependent}, 222100 (3); MODY, type III, 600496 (3); Hepatic adenoma, somatic, 142330 (3); Renal cell carcinoma, 144700 (3); Diabetes mellitus, insulin-dependent, 20, 612520 (3); {Diabetes mellitus, noninsulin-dependent, 2}, 125853 (3)                                                                                                                | <i>HNF1A</i>   | 1.3 | 30377832 |
| 37 | 20q12-q13.1 | AD    | {Diabetes mellitus, noninsulin-dependent}, 125853 (3); MODY, type I, 125850 (3),                                                                                                                                                                                                                                                                                                      | <i>HNF4A</i>   | 1.3 | 30377832 |

|    |               |       |                                                                                                                                                                                                                                                                                                                    |                |     |           |
|----|---------------|-------|--------------------------------------------------------------------------------------------------------------------------------------------------------------------------------------------------------------------------------------------------------------------------------------------------------------------|----------------|-----|-----------|
| 38 | 17q12         | AD    | Autosomal dominant; Fanconi renotubular syndrome 4, with maturity-onset diabetes of the young, 616026 (3)                                                                                                                                                                                                          | <i>HNF1B</i>   | 1.3 | 30377832  |
| 39 | 11p15.1       | AR/AD | Diabetes mellitus, noninsulin-dependent, 125853 (3); Renal cysts and diabetes syndrome, 137920 (3); {Renal cell carcinoma}, 144700 (3)                                                                                                                                                                             | <i>ABCC8</i>   | 1.3 | 30377832  |
| 40 | 11p15.1       | AR/AD | Diabetes mellitus, permanent neonatal, 606176 (3); Diabetes mellitus, noninsulin-dependent, 125853 (3); Diabetes mellitus, transient neonatal 2, 610374 (3); Hyperinsulinemic hypoglycemia, familial, 1, 256450 (3); Hypoglycemia of infancy, leucine-sensitive, 240800 (3)                                        | <i>KCNJ11</i>  | 1.3 | 30377832  |
| 41 | 11p15.5       | AR/AD | Maturity-onset diabetes of the young, type 13, 616329 (3); {Diabetes mellitus, type 2, susceptibility to}, 125853 (3); Diabetes, permanent neonatal, with or without neurologic features, 606176 (3); Diabetes mellitus, transient neonatal, 3, 610582 (3); Hyperinsulinemic hypoglycemia, familial, 2, 601820 (3) | <i>INS</i>     | 1.3 | 30377832  |
| 42 | 2q32          | AD    | Maturity-onset diabetes of the young 6, 606394 (3); {Diabetes mellitus, noninsulin-dependent}, 125853 (3)                                                                                                                                                                                                          | <i>NEUROD1</i> | 1.3 | 30377832  |
| 43 | 13q12.1       | AR/AD | {Diabetes mellitus, type II, susceptibility to}, 125853 (3); Pancreatic agenesis 1, 260370 (3); MODY, type IV, 606392 (3)                                                                                                                                                                                          | <i>IPF1</i>    | 1.3 | 30377832  |
| 44 | 9q34.3        | AD    | Maturity-onset diabetes of the young, type VIII, 609812 (3)                                                                                                                                                                                                                                                        | <i>CEL</i>     | 1.3 | 30377832  |
| 45 | NA            | AD    | Wolfram-like syndrome, autosomal dominant, 614296 (3)                                                                                                                                                                                                                                                              | <i>WSF1</i>    | 1.3 | 30377832  |
| 46 | 6q22.2        | AR    | Mitchell-Riley syndrome, 615710 (3)                                                                                                                                                                                                                                                                                | <i>RFX6</i>    | 1.3 | 30377832  |
| 47 | 3p21.1-p14.3  | AD    | {Maturity-onset diabetes of the young, type 14}, 616511 (3)                                                                                                                                                                                                                                                        | <i>APPL1</i>   | 1.3 | 30377832  |
| 48 | 18q11.1-q11.2 | AD    | Pancreatic agenesis and congenital heart defects, 600001 (3); Atrial septal defect 9, 614475 (3); Atrioventricular septal defect 5, 614474 (3); Persistent truncus arteriosus, 217095 (3); Tetralogy of Fallot, 187500 (3)                                                                                         | <i>GATA6</i>   | 1.3 | 30377832  |
| 49 | 10p12.3       | AR    | Pancreatic and cerebellar agenesis, 609069 (3); Pancreatic agenesis 2, 615935 (3)                                                                                                                                                                                                                                  | <i>PTF1A</i>   | 1.3 | 30377832  |
| 50 | 2p12          | AR    | Wolcott-Rallison syndrome, 226980 (3)                                                                                                                                                                                                                                                                              | <i>EIF2AK3</i> | 1.3 | 30377832  |
| 51 | 7p15-p13      | AR/AD | Diabetes mellitus, noninsulin-dependent, late onset, 125853 (3); Diabetes mellitus, permanent neonatal, 606176 (3); MODY, type II, 125851 (3); Autosomal dominant; Hyperinsulinemic hypoglycemia, familial, 3, 602485 (3)                                                                                          | <i>GCK</i>     | 1.3 | 30377832  |
| 52 | 1p34.1        | AR    | Methylmalonic aciduria and homocystinuria, cblC type, 277400 (3)                                                                                                                                                                                                                                                   | <i>MMACHC</i>  | 2   | 30356112* |
| 53 | 1p36.22       | AR    | {Vascular disease, susceptibility to} (3); {Schizophrenia, susceptibility to}, 181500 (3); Homocystinuria due to MTHFR                                                                                                                                                                                             | <i>MTHFR</i>   | 2   | 30356112* |

|    |         |         |                                                                                                                                                                                                                                                                                                                                                                                                                                                                                                                            |                |   |           |
|----|---------|---------|----------------------------------------------------------------------------------------------------------------------------------------------------------------------------------------------------------------------------------------------------------------------------------------------------------------------------------------------------------------------------------------------------------------------------------------------------------------------------------------------------------------------------|----------------|---|-----------|
|    |         |         | deficiency, 236250 (3); {Neural tube defects, susceptibility to}, 601634 (3); {Thromboembolism, susceptibility to}, 188050 (3)                                                                                                                                                                                                                                                                                                                                                                                             |                |   |           |
| 54 | 1p36.22 | AR      | Ehlers-Danlos syndrome, kyphoscoliotic type, 1, 225400 (3)                                                                                                                                                                                                                                                                                                                                                                                                                                                                 | <i>PLOD1</i>   | 2 | 30356112* |
| 55 | 1p36.22 | AD      | Hereditary motor and sensory neuropathy VIA, 601152 (3); Charcot-Marie-Tooth disease, axonal, type 2A2B, 617087 (3), Autosomal recessive; Charcot-Marie-Tooth disease, axonal, type 2A2A, 609260 (3)                                                                                                                                                                                                                                                                                                                       | <i>MFN2</i>    | 2 | 30356112* |
| 56 | 1q22    | AR      | Grange syndrome, 602531 (3)                                                                                                                                                                                                                                                                                                                                                                                                                                                                                                | <i>YY1API</i>  | 2 | 30356112* |
| 57 | 1q22    | AD/AR   | Muscular dystrophy, congenital, 613205 (3); Lipodystrophy, familial partial, type 2, 151660 (3), Autosomal dominant; Charcot-Marie-Tooth disease, type 2B1, 605588 (3) Cardiomyopathy, dilated, 1A, 115200 (3) ; Heart-hand syndrome, Slovenian type, 610140 (3); Hutchinson-Gilford progeria, 176670 (3); Restrictive dermopathy, lethal, 275210 (3); Mandibuloacral dysplasia, 248370 (3); Emery-Dreifuss muscular dystrophy 2, 181350 (3); Emery-Dreifuss muscular dystrophy 3, 616516 (3); Malouf syndrome, 212112 (3) | <i>LMNA</i>    | 2 | 30356112* |
| 58 | 1q23.3  | AD      | Thrombocytopenic purpura, autoimmune, 188030 (1),                                                                                                                                                                                                                                                                                                                                                                                                                                                                          | <i>FCGR2C</i>  | 2 | 30356112* |
| 59 | 1q24.2  | AD,/ AR | {Pregnancy loss, recurrent, susceptibility to, 1}, 614389 (3); Thrombophilia due to activated protein C resistance, 188055 (3); {Thrombophilia, susceptibility to, due to factor V Leiden}, 188055 (3), ; Factor V deficiency, 227400 (3); {Budd-Chiari syndrome}, 600880 (3); {Stroke, ischemic, susceptibility to}, 601367 (3), Multifactorial                                                                                                                                                                           | <i>F5</i>      | 2 | 30356112* |
| 60 | 1q24.2  | AR      | Thiamine-responsive megaloblastic anemia syndrome, 249270 (3)                                                                                                                                                                                                                                                                                                                                                                                                                                                              | <i>SLC19A2</i> | 2 | 30356112* |
| 61 | 1q32    | AD      | Glomerulopathy with fibronectin deposits 1, 137950 (2)                                                                                                                                                                                                                                                                                                                                                                                                                                                                     | <i>GFND1</i>   | 2 | 30356112* |
| 62 | 1q41    | AD      | Loeys-Dietz syndrome 4, 614816 (3)                                                                                                                                                                                                                                                                                                                                                                                                                                                                                         | <i>TGFB2</i>   | 2 | 30356112* |
| 63 | 1q42.13 | AR      | Coenzyme Q10 deficiency, primary, 4, 612016 (3)                                                                                                                                                                                                                                                                                                                                                                                                                                                                            | <i>ADCK3</i>   | 2 | 30356112* |
| 64 | 2p11.2  | AD/AR   | Vitamin K-dependent clotting factors, combined deficiency of, 1, 277450 (3); Pseudoxanthoma elasticum-like disorder with multiple coagulation factor deficiency, 610842 (3)                                                                                                                                                                                                                                                                                                                                                | <i>GGCX</i>    | 2 | 30356112* |
| 65 | 2q14.3  | AD/AR   | Thrombophilia due to protein C deficiency, autosomal dominant, 176860(3); Thrombophilia due to protein C deficiency, autosomal recessive, 612304 (3)                                                                                                                                                                                                                                                                                                                                                                       | <i>PROC</i>    | 2 | 30356112* |
| 66 | 2q32.2  | AD      | Immunodeficiency 31C, autosomal dominant, 614162 (3); Immunodeficiency 31A, mycobacteriosis, autosomal dominant, 614892 (3); Immunodeficiency 31B, mycobacterial and viral infections, autosomal recessive, 613796 (3)                                                                                                                                                                                                                                                                                                     | <i>STAT1</i>   | 2 | 30356112* |

|    |         |            |                                                                                                                                                                                                                               |                 |   |           |
|----|---------|------------|-------------------------------------------------------------------------------------------------------------------------------------------------------------------------------------------------------------------------------|-----------------|---|-----------|
| 67 | 2q32.2  | AD         | Ehlers-Danlos syndrome, vascular type, 130050 (3); Polymicrogyria with or without vascular-type EDS, 618343 (3)                                                                                                               | <i>COL3A1</i>   | 2 | 30356112* |
| 68 | 2q32.2  | AD         | Ehlers-Danlos syndrome, classic type, 2, 130010 (3)                                                                                                                                                                           | <i>COL5A2</i>   | 2 | 30356112* |
| 69 | 2q34    | AR/ND      | Carbamoylphosphate synthetase I deficiency, 237300 (3); {Pulmonary hypertension, neonatal, susceptibility to}, 615371 (3)                                                                                                     | <i>CPS1</i>     | 2 | 30356112* |
| 70 | 2q35    | AR         | Schimke immunoosseous dysplasia, 242900 (3)                                                                                                                                                                                   | <i>SMARCAL1</i> | 2 | 30356112* |
| 71 | 3p21.31 | AD         | {Systemic lupus erythematosus, susceptibility to}, 152700 (3); Vasculopathy, retinal, with cerebral leukodystrophy, 192315 (3); Aicardi-Goutieres syndrome 1, dominant and recessive, 225750 (3); Chilblain lupus, 610448 (3) | <i>TREX1</i>    | 2 | 30356112* |
| 72 | 3p24.1  | AD         | Esophageal cancer, somatic, 133239 (3); Colorectal cancer, hereditary nonpolyposis, type 6, 614331 (3); Loews-Dietz syndrome 2, 610168 (3)                                                                                    | <i>TGFBR2</i>   | 2 | 30356112* |
| 73 | 3p25.3  | AR         | Pheochromocytoma, 171300 (3); Erythrocytosis, familial, 2, 263400 (3); von Hippel-Lindau syndrome, 193300 (3); Renal cell carcinoma, somatic, 144700 (3); Hemangioblastoma, cerebellar, somatic (3)                           | <i>VHL</i>      | 2 | 30356112* |
| 74 | 3q11.1  | AR         | Thrombophilia due to protein S deficiency, autosomal recessive, 614514 (3); Thrombophilia due to protein S deficiency, Autosomal dominant, 612336 (3)                                                                         | <i>PROS1</i>    | 2 | 30356112* |
| 75 | 3q21.3  | AR         | Mitochondrial complex I deficiency, nuclear type 20, 611126 (3)                                                                                                                                                               | <i>ACAD9</i>    | 2 | 30356112* |
| 76 | 3q22.3  | AR         | Propionicacidemia, 606054 (3)                                                                                                                                                                                                 | <i>PCCB</i>     | 2 | 30356112* |
| 77 | 3q26.1  | AD         | Cerebral cavernous malformations 3, 603285 (3)                                                                                                                                                                                | <i>PDCD10</i>   | 2 | 30356112* |
| 78 | 3q27.3  | AR         | [Kininogen deficiency], 228960 (3); [High molecular weight kininogen deficiency], 228960 (3)                                                                                                                                  | <i>KNG1</i>     | 2 | 30356112* |
| 79 | 4q31.3  | AR         | Dysfibrinogenemia, congenital, 616004 (3); Amyloidosis, familial visceral, 105200 (3); Hypodysfibrinogenemia, congenital, 616004 (3); Afibrinogenemia, congenital, 202400 (3)                                                 | <i>FGA</i>      | 2 | 30356112* |
| 80 | 4q31.3  | AR         | Dysfibrinogenemia, congenital, 616004 (3); Afibrinogenemia, congenital, 202400 (3); Hypofibrinogenemia, congenital, 202400 (3)                                                                                                | <i>FGB</i>      | 2 | 30356112* |
| 81 | 4q32.1  | AR         | Hypofibrinogenemia, congenital, 202400 (3); Hypodysfibrinogenemia, 616004 (3); Dysfibrinogenemia, congenital, 616004 (3); Afibrinogenemia, congenital, 202400 (3)                                                             | <i>FGG</i>      | 2 | 30356112* |
| 82 | 4q32.1  | AR         | Moyamoya 6 with achalasia, 615750 (3)                                                                                                                                                                                         | <i>GUCY1A3</i>  | 2 | 30356112* |
| 83 | 5q14.3  | AD/somatic | Capillary malformation-arteriovenous malformation 1, 608354 (3); Basal cell carcinoma, somatic, 605462 (3)                                                                                                                    | <i>RASA1</i>    | 2 | 30356112* |
| 84 | 5q33.1  | AR         | Osteogenesis imperfecta, type XVII, 616507 (3)                                                                                                                                                                                | <i>SPARC</i>    | 2 | 30356112* |

|     |         |            |                                                                                                                                                                                                                                                                             |                 |   |           |
|-----|---------|------------|-----------------------------------------------------------------------------------------------------------------------------------------------------------------------------------------------------------------------------------------------------------------------------|-----------------|---|-----------|
| 85  | 6p12.3  | AD/AR      | Methylmalonic aciduria, mut(0) type, 251000 (3)                                                                                                                                                                                                                             | <i>MUT</i>      | 2 | 30356112* |
| 86  | 6p25.1  | AR         | {Myocardial infarction, protection against}, 608446 (3); Factor XIII deficiency, 613225 (3); {Venous thrombosis, protection against}, 188050 (3)                                                                                                                            | <i>F13A1</i>    | 2 | 30356112* |
| 87  | 6p25.3  | AD/ND      | Axenfeld-Rieger syndrome, type 3, 602482 (3); Anterior segment dysgenesis 3, multiple subtypes, 601631 (3)                                                                                                                                                                  | <i>FOXC1</i>    | 2 | 30356112* |
| 88  | 6q23.2  | AR         | Hypophosphatemic rickets, autosomal recessive, 2, 613312 (3); Cole disease, 615522 (3); {Obesity, susceptibility to}, 601665 (3); Arterial calcification, generalized, of infancy, 1, 208000 (3); {Diabetes mellitus, non-insulin-dependent, susceptibility to}, 125853 (3) | <i>ENPP1</i>    | 2 | 30356112* |
| 89  | 6q26    | AR         | Dysplasminogenemia, 217090 (3); Plasminogen deficiency, type 1, 217090 (3)                                                                                                                                                                                                  | <i>PLG</i>      | 2 | 30356112* |
| 90  | 7p13    | AD         | Cerebral cavernous malformations-2, 603284 (3)                                                                                                                                                                                                                              | <i>C7orf22</i>  | 2 | 30356112* |
| 91  | 7p14    | AD         | Telangiectasia, hereditary hemorrhagic, type 4, 610655 (2)                                                                                                                                                                                                                  | <i>HHT4</i>     | 2 | 30356112* |
| 92  | 7q21.2  | AD         | Cavernous malformations of CNS and retina, 116860 (3); Cerebral cavernous malformations-1, 116860 (3); Hyperkeratotic cutaneous capillary-venous malformations associated with cerebral capillary malformations, 116860 (3)                                                 | <i>CCMI</i>     | 2 | 30356112* |
| 93  | 7q22.1  | AD/AR      | {Transcription of plasminogen activator inhibitor, modulator of} (3); Plasminogen activator inhibitor-1 deficiency, 613329 (3)                                                                                                                                              | <i>SERPINE1</i> | 2 | 30356112* |
| 94  | 7q22.1  | AR         | Lysyl hydroxylase 3 deficiency, 612394 (3)                                                                                                                                                                                                                                  | <i>PLOD3</i>    | 2 | 30356112* |
| 95  | 8p21.1  | AR         | Roberts syndrome, 268300 (3); SC phocomelia syndrome, 269000 (3)                                                                                                                                                                                                            | <i>ESCO2</i>    | 2 | 30356112* |
| 96  | 9p24.1  | AD/somatic | Myelofibrosis, somatic, 254450 (3); Thrombocytopenia 3, 614521 (3); Polycythemia vera, somatic, 263300 (3); {Budd-Chiari syndrome, somatic}, 600880 (3); Leukemia, acute myeloid, somatic, 601626 (3); Erythrocytosis, somatic, 133100 (3)                                  | <i>JAK2</i>     | 2 | 30356112* |
| 97  | 9q22.33 | AD         | Loeys-Dietz syndrome 1, 609192 (3); {Multiple self-healing squamous epithelioma, susceptibility to}, 132800 (3)                                                                                                                                                             | <i>TGFBR1</i>   | 2 | 30356112* |
| 98  | 9q31.1  | AR         | HDL deficiency, familial, 1, 604091 (3); Tangier disease, 205400 (3)                                                                                                                                                                                                        | <i>ABCA1</i>    | 2 | 30356112* |
| 99  | 9q34.11 | AD         | Telangiectasia, hereditary hemorrhagic, type 1, 187300 (3)                                                                                                                                                                                                                  | <i>ENG</i>      | 2 | 30356112* |
| 100 | 9q34.11 | AR         | Citrullinemia, 215700 (3)                                                                                                                                                                                                                                                   | <i>ASS1</i>     | 2 | 30356112* |
| 101 | 9q34.13 | AD         | Tuberous sclerosis-1, 191100 (3); Focal cortical dysplasia, type II, somatic, 607341 (3); Lymphangioliomyomatosis, 606690 (3)                                                                                                                                               | <i>TSC1</i>     | 2 | 30356112* |
| 102 | 9q34.3  | AD         | Ehlers-Danlos syndrome, classic type, 1, 130000 (3)                                                                                                                                                                                                                         | <i>COL5A1</i>   | 2 | 30356112* |
| 103 | 10p14   | AD         | Hypoparathyroidism, sensorineural deafness, and renal dysplasia, 146255 (3)                                                                                                                                                                                                 | <i>GATA3</i>    | 2 | 30356112* |

|     |          |       |                                                                                                                                                                                                                                                                                                                                                               |               |   |           |
|-----|----------|-------|---------------------------------------------------------------------------------------------------------------------------------------------------------------------------------------------------------------------------------------------------------------------------------------------------------------------------------------------------------------|---------------|---|-----------|
| 104 | 10q23.31 | AD    | Aortic aneurysm, familial thoracic 6, 611788 (3); Multisystemic smooth muscle dysfunction syndrome, 613834 (3); Moyamoya disease 5, 614042 (3)                                                                                                                                                                                                                | <i>ACTA2</i>  | 2 | 30356112* |
| 105 | 10q26.13 | AD/AR | {Macular degeneration, age-related, neovascular type}, 610149 (3); {Macular degeneration, age-related, 7}, 610149 (3); Cerebral arteriopathy, autosomal dominant, with subcortical infarcts and leukoencephalopathy, type 2, 616779 (3); CARASIL syndrome, 600142 (3)                                                                                         | <i>HTRA1</i>  | 2 | 30356112* |
| 106 | 11p11.2  | AD    | {Pregnancy loss, recurrent, susceptibility to, 2}, 614390 (3); Hypoprothrombinemia, 613679 (3); Dysprothrombinemia, 613679 (3); Autosomal recessive; Thrombophilia due to thrombin defect, 188050 (3); {Stroke, ischemic, susceptibility to}, 601367 (3); Multifactorial                                                                                      | <i>F2</i>     | 2 | 30356112* |
| 107 | 11p13    | AR    | Hemolytic anemia, CD59-mediated, with or without immune-mediated polyneuropathy, 612300 (3)                                                                                                                                                                                                                                                                   | <i>CD59</i>   | 2 | 30356112* |
| 108 | 11p15.4  | AD/AR | Myopathy, tubular aggregate, 1, 160565 (3); Immunodeficiency 10, 612783 (3); Stormorken syndrome, 185070 (3);                                                                                                                                                                                                                                                 | <i>STIM1</i>  | 2 | 30356112* |
| 109 | 11p15.4  | AR    | Thalassemia, beta, 613985 (3); Methemoglobinemia, beta type, 617971 (3); Erythrocytosis 6, 617980 (3); Heinz body anemia, 140700 (3); Delta-beta thalassemia, 141749 (3); Thalassemia-beta, dominant inclusion-body, 603902 (3); Hereditary persistence of fetal hemoglobin, 141749 (3); {Malaria, resistance to}, 611162 (3); Sickle cell anemia, 603903 (3) | <i>HBB</i>    | 2 | 30356112* |
| 110 | 11q25    | AR    | Hemorrhagic destruction of the brain, subependymal calcification, and cataracts, 613730 (3)                                                                                                                                                                                                                                                                   | <i>JAM3</i>   | 2 | 30356112* |
| 111 | 11q13.1  | AR    | Cutis laxa, autosomal recessive, type IB, 614437 (3)                                                                                                                                                                                                                                                                                                          | <i>EFEMP2</i> | 2 | 30356112* |
| 112 | 12p13.31 | AD    | Ehlers-Danlos syndrome, periodontal type, 1, 130080 (3)                                                                                                                                                                                                                                                                                                       | <i>C1R</i>    | 2 | 30356112* |
| 113 | 12p13.31 | AD    | Aortic aneurysm, familial thoracic 9, 616166 (3)                                                                                                                                                                                                                                                                                                              | <i>MFAP5</i>  | 2 | 30356112* |
| 114 | 12q13.13 | AD    | Telangiectasia, hereditary hemorrhagic, type 2, 600376 (3)                                                                                                                                                                                                                                                                                                    | <i>ACVRL1</i> | 2 | 30356112* |
| 115 | 12q24.13 | AD    | LEOPARD syndrome 1, 151100 (3); Metachondromatosis, 156250 (3); Noonan syndrome 1, 163950 (3); Leukemia, juvenile myelomonocytic, somatic, 607785 (3)                                                                                                                                                                                                         | <i>PTPN11</i> | 2 | 30356112* |
| 116 | 13q14.11 | AR    | Congenital disorder of glycosylation, type III, 614576 (3); Shaheen syndrome, 615328 (3)                                                                                                                                                                                                                                                                      | <i>COG6</i>   | 2 | 30356112* |
| 117 | 13q14.2  | AD    | Dementia, familial British, 176500 (3); ?Retinal dystrophy with inner retinal dysfunction and ganglion cell abnormalities, 616079 (3); Dementia, familial Danish, 117300 (3)                                                                                                                                                                                  | <i>ITM2B</i>  | 2 | 30356112* |
| 118 | 13q34    | AD    | Angiopathy, hereditary, with nephropathy, aneurysms, and muscle cramps, 611773 (3); Brain small vessel disease with or                                                                                                                                                                                                                                        | <i>COL4A1</i> | 2 | 30356112* |



|     |          |       |                                                                                                                                                                                                                                                                                                                                                  |               |   |           |
|-----|----------|-------|--------------------------------------------------------------------------------------------------------------------------------------------------------------------------------------------------------------------------------------------------------------------------------------------------------------------------------------------------|---------------|---|-----------|
|     |          |       | without ocular anomalies, 175780 (3); {Hemorrhage, intracerebral, susceptibility to}, 614519 (3); ?Retinal arteries, tortuosity of, 180000 (3); Microangiopathy and leukoencephalopathy, pontine, autosomal dominant, 618564 (3)                                                                                                                 |               |   |           |
| 119 | 13q32.3  | AR    | Propionicacidemia, 606054 (3)                                                                                                                                                                                                                                                                                                                    | <i>PCCA</i>   | 2 | 30356112* |
| 120 | 13q34    | AD    | Brain small vessel disease 2, 614483 (3); {Hemorrhage, intracerebral, susceptibility to}, 614519 (3)                                                                                                                                                                                                                                             | <i>COL4A2</i> | 2 | 30356112* |
| 121 | 13q34    | AR    | {Myocardial infarction, decreased susceptibility to}, 608446 (3); Factor VII deficiency, 227500 (3)                                                                                                                                                                                                                                              | <i>F7</i>     | 2 | 30356112* |
| 122 | 13q34    | AR    | Factor X deficiency, 227600 (3)                                                                                                                                                                                                                                                                                                                  | <i>F10</i>    | 2 | 30356112* |
| 123 | 14q24.3  | AD    | Loeys-Dietz syndrome 5, 615582 (3); Arrhythmogenic right ventricular dysplasia 1, 107970 (3)                                                                                                                                                                                                                                                     | <i>TGFB3</i>  | 2 | 30356112* |
| 124 | 15q21.1  | AD    | Marfan lipodystrophy syndrome, 616914 (3) ; Marfan syndrome, 154700 (3) ; MASS syndrome, 604308 (3); Ectopia lentis, familial, 129600 (3) ; Acromicric dysplasia, 102370 (3); Weill-Marchesani syndrome 2, dominant, 608328 (3); Geleophysic dysplasia 2, 614185 (3); Stiff skin syndrome, 184900 (3)                                            | <i>FBNI</i>   | 2 | 30356112* |
| 125 | 15q15.1  | AR    | Isovaleric acidemia, 243500 (3)                                                                                                                                                                                                                                                                                                                  | <i>IVD</i>    | 2 | 30356112* |
| 126 | 16p13.11 | AD    | Aortic aneurysm, familial thoracic 4, 132900 (3)                                                                                                                                                                                                                                                                                                 | <i>MYH11</i>  | 2 | 30356112* |
| 127 | 15q22.33 | AD    | Loeys-Dietz syndrome 3, 613795 (3)                                                                                                                                                                                                                                                                                                               | <i>SMAD3</i>  | 2 | 30356112* |
| 128 | 16p13.11 | AD/AR | Arterial calcification, generalized of infancy, 2, 614473(3); Pseudoxanthoma elasticum, 264800,(3); Pseudoxanthoma elasticum, forme fruste,177850 (3)                                                                                                                                                                                            | <i>ABCC6</i>  | 2 | 30356112* |
| 129 | 16p13.3  | AD    | Tuberous sclerosis-2, 613254 (3) ; ?Focal cortical dysplasia, type II, somatic, 607341 (3); Lymphangioliomyomatosis, somatic, 606690 (3)                                                                                                                                                                                                         | <i>TSC2</i>   | 2 | 30356112* |
| 130 | 16p13.3  | AD    | Polycystic kidney disease 1, 173900 (3)                                                                                                                                                                                                                                                                                                          | <i>PKDI</i>   | 2 | 30356112* |
| 131 | 17q11.2  | AD    | Neurofibromatosis-Noonan syndrome, 601321 (3); Leukemia, juvenile myelomonocytic, 607785 (3); Neurofibromatosis, familial spinal, 162210 (3); Watson syndrome, 193520 (3); Neurofibromatosis, type 1, 162200 (3)                                                                                                                                 | <i>NFI</i>    | 2 | 30356112* |
| 132 | 17q21.33 | AD    | Osteogenesis imperfecta, type I, 166200 (3); Osteogenesis imperfecta, type IV, 166220 (3) ; Osteogenesis imperfecta, type II, 166210 (3); {Bone mineral density variation QTL, osteoporosis}, 166710 (3) ; Caffey disease, 114000 (3); Ehlers-Danlos syndrome, arthrochalasia type, 1, 130060 (3); Osteogenesis imperfecta, type III, 259420 (3) | <i>COL1A1</i> | 2 | 30356112* |
| 133 | 17q25.3  | AR    | Glycogen storage disease II, 232300 (3)                                                                                                                                                                                                                                                                                                          | <i>GAA</i>    | 2 | 30356112* |
| 134 | 18q12.1  | AD    | Amyloidosis, hereditary, transthyretin-related, 105210 (3); [Dystransthyretinemic hyperthyroxinemia], 145680 (3), Autosomal dominant; Carpal tunnel syndrome, familial, 115430 (3)                                                                                                                                                               | <i>TTR</i>    | 2 | 30356112* |

|     |          |       |                                                                                                                                                                                                                                                                      |                |   |           |
|-----|----------|-------|----------------------------------------------------------------------------------------------------------------------------------------------------------------------------------------------------------------------------------------------------------------------|----------------|---|-----------|
| 135 | 18q21.2  | AD    | Polyposis, juvenile intestinal, 174900 (3); Juvenile polyposis/hereditary hemorrhagic telangiectasia syndrome, 175050 (3); Myhre syndrome, 139210 (3) ; Pancreatic cancer, somatic, 260350 (3)                                                                       | <i>SMAD4</i>   | 2 | 30356112* |
| 136 | 19p13.12 | AD    | ?Myofibromatosis, infantile 2, 615293 (3); Cerebral arteriopathy with subcortical infarcts and leukoencephalopathy 1, 125310 (3); Lateral meningocele syndrome, 130720 (3)                                                                                           | <i>NOTCH3</i>  | 2 | 30356112* |
| 137 | 19p13.13 | AR    | Glutaricaciduria, type I, 231670 (3)                                                                                                                                                                                                                                 | <i>GCDH</i>    | 2 | 30356112* |
| 138 | 19p13.2  | AR    | Spondyloenchondrodysplasia with immune dysregulation, 607944 (3)                                                                                                                                                                                                     | <i>ACPS5</i>   | 2 | 30356112* |
| 139 | 19p13.13 | AD    | Spinocerebellar ataxia 6, 183086 (3); Epileptic encephalopathy, early infantile, 42, 617106 (3); Migraine, familial hemiplegic, 1, with progressive cerebellar ataxia, 141500 (3); Episodic ataxia, type 2, 108500 (3); Migraine, familial hemiplegic, 1, 141500 (3) | <i>CACNA1A</i> | 2 | 30356112* |
| 140 | 19q13.2  | AD    | Abdominal obesity-metabolic syndrome 3, 615812 (3)                                                                                                                                                                                                                   | <i>DYRK1B</i>  | 2 | 30356112* |
| 141 | 20p11.21 | AD    | Thrombophilia due to thrombomodulin defect, 614486 (3); {Hemolytic uremic syndrome, atypical, susceptibility to, 6}, 612926 (3)                                                                                                                                      | <i>THBD</i>    | 2 | 30356112* |
| 142 | 20p11.21 | AD    | Cerebral amyloid angiopathy, 105150 (3); {Macular degeneration, age-related, 11}, 611953 (3)                                                                                                                                                                         | <i>CST3</i>    | 2 | 30356112* |
| 143 | 20p12.2  | AD    | ?Deafness, congenital heart defects, and posterior embryotoxon, 617992 (3); Alagille syndrome 1, 118450 (3); Tetralogy of Fallot, 187500 (3)                                                                                                                         | <i>JAG1</i>    | 2 | 30356112* |
| 144 | 20q11.23 | AR/AD | ?Chilblain lupus 2, 614415 (3) ; Aicardi-Goutieres syndrome 5, 612952 (3)                                                                                                                                                                                            | <i>SAMHD1</i>  | 2 | 30356112* |
| 145 | 20q13.12 | AR    | Galactosialidosis, 256540 (3)                                                                                                                                                                                                                                        | <i>CTSA</i>    | 2 | 30356112* |
| 146 | 20q13.12 | AR    | Arterial tortuosity syndrome, 208050 (3)                                                                                                                                                                                                                             | <i>SLC2A10</i> | 2 | 30356112* |
| 147 | 21q21.3  | AD    | Cerebral amyloid angiopathy, Dutch, Italian, Iowa, Flemish, Arctic variants, 605714 (3); Alzheimer disease 1, familial, 104300 (3)                                                                                                                                   | <i>APP</i>     | 2 | 30356112* |
| 148 | 21q22.3  | AR    | Homocystinuria, B6-responsive and nonresponsive types, 236200 (3); Thrombosis, hyperhomocysteinemic, 236200 (3)                                                                                                                                                      | <i>CBS</i>     | 2 | 30356112* |
| 149 | 21q22.3  | AR    | Microcephalic osteodysplastic primordial dwarfism, type II, 210720 (3)                                                                                                                                                                                               | <i>PCNT</i>    | 2 | 30356112* |
| 150 | 22q11.1  | AR    | Vasculitis, autoinflammation, immunodeficiency, and hematologic defects syndrome, 615688 (3); ?Sneddon syndrome, 182410 (3)                                                                                                                                          | <i>CECRI</i>   | 2 | 30356112* |
| 151 | Xq21.1   | X-LR  | Occipital horn syndrome, 304150 (3); Menkes disease, 309400 (3); Spinal muscular atrophy, distal, X-linked 3, 300489 (3)                                                                                                                                             | <i>ATP7A</i>   | 2 | 30356112* |
| 152 | Xp11.4   | X-LR  | Ornithine transcarbamylase deficiency, 311250 (3)                                                                                                                                                                                                                    | <i>OTC</i>     | 2 | 30356112* |
| 153 | Xq22.1   | X-L   | Fabry disease, 301500 (3); Fabry disease, cardiac variant, 301500 (3)                                                                                                                                                                                                | <i>GLA</i>     | 2 | 30356112* |
| 154 | Xq28     | X-LR  | Moyamoya disease 4, 300845 (4),                                                                                                                                                                                                                                      | <i>MYMY4</i>   | 2 | 30356112* |

---

|     |      |      |    |            |   |           |
|-----|------|------|----|------------|---|-----------|
| 155 | Xq28 | X-LR | NA | <i>F8A</i> | 2 | 30356112* |
|-----|------|------|----|------------|---|-----------|

---

1  
2 Category: 1.1: Gene variations related to vascular risk factors: Hypertension; Category 1.2: Gene variations  
3 related to vascular risk factors: dyslipidemia; Category 1.3: Gene variations related to vascular risk factors:  
4 diabetes; Category 2: Gene variations related to other stroke subtypes.  
5 \*: stroke gene panel 1 (SGP1) from the article (PMID: 30356112), “genes were included that contain at least one  
6 variant for which a causative role has been shown or postulated and reported from at least one well-documented  
7 human patient in the literature”  
8  
9  
10

1 **eTable 2. Primers for the SNVs/ InDels and the balanced translocation validation by**  
 2 **Sanger sequencing**

| Coordinate            | Variants                                          | Forward (5'-3')              | Reverse (5'-3')              |
|-----------------------|---------------------------------------------------|------------------------------|------------------------------|
| chr17:78350324<br>T>A | RNF213:NM_001256071:exon52<br>:c.T13409A:p.F4470Y | AATGCAAGATCCTTT<br>CACCTCCT  | CTGTGAAATAACAA<br>AGGGCAAGG  |
| chr17:78360549<br>G>A | RNF213:NM_001256071:exon63<br>:c.G14780A:p.R4927Q | GTTTTCCACTGCTCC<br>AACTGT    | TTCACAACAGACAC<br>ACCAAATGA  |
| chr17:78346850<br>G>A | RNF213:NM_001256071:exon49<br>:c.G12827A:p.R4276Q | GATGTGTTTCTGTGA<br>ATGCCTGT  | CTTCTCACCTGCTG<br>CTTGACAA   |
| chr17:78298836<br>A>G | RNF213:NM_001256071:exon18<br>:c.A3031G:p.T1011A  | AAGGAAGGAGGGTG<br>ACTGGTTAT  | CGCAAACATACCAC<br>ACAATCTGA  |
| chr17:78332222<br>T>C | RNF213:NM_001256071:exon37<br>:c.T10997C:p.M3666T | TGTCGCTGTAGTGTG<br>GTAAATAG  | GCATATTAGGGTCC<br>TGCTGTGTT  |
| chr17:78360097<br>G>A | RNF213:NM_001256071:exon62<br>:c.G14587A:p.D4863N | GCATCAAAAGGGAG<br>CTGAAAG    | GCTGAAGGAGTGA<br>GTGTCTGTT   |
| chr17:78360619<br>G>C | RNF213:NM_001256071:exon63<br>:c.G14850C:p.E4950D | CCCTGCAACATAGAG<br>CCCTAG    | GAGGGAGGAGATA<br>CAGACAGA    |
| chr17:78363034<br>C>T | RNF213:NM_001256071:exon65<br>:c.C15062T:p.A5021V | CGATTTGTTCTGCT<br>CTCCG      | CCCTGATGCTCCT<br>ATCCCTC     |
| chr17:78286895<br>G>A | RNF213:NM_001256071:exon15<br>:c.G2739A:p.W913X   | GAATGGAAGTGCTTT<br>GGGAATGT  | AATCACGATCAGTC<br>ACATCCCTA  |
| chr17:78313074<br>C>T | RNF213:NM_001256071:exon26<br>:c.C4907T:p.T1636M  | ACAATGACTCTTCC<br>CTGATGAG   | CTTCTGGGTCACAA<br>ATCTCTTCC  |
| chr17:78320498<br>G>A | RNF213:NM_001256071:exon29<br>:c.G8363A:p.G2788D  | TTCTGGATGAAATAA<br>ACCGGGC   | CTCATCTAACACCA<br>CCACAGAGA  |
| chr17:78268635<br>G>A | RNF213:NM_001256071:exon9:<br>c.G1588A:p.A530T    | TCTGCCCATTTACT<br>CCATATCT   | TCTTCTCCCTGTAC<br>TGCAAATC   |
| chr17:78343634<br>G>A | RNF213:NM_001256071:exon46<br>:c.G12392A:p.R4131H | CAGAGTAGGTTGCTT<br>TCTTCTG   | CACAACCAGTACAA<br>GTAACCAGG  |
| chr12:992685<br>G>A   | WNK1:NM_018979:exon16:c.G<br>3614A:p.G1205E       | ACCCAACCTGTGATT<br>TAGTGATG  | ACATAAAAAGTTTGT<br>TGTCGGTCA |
| chr12:988932<br>C>A   | WNK1:NM_018979:exon11:c.C<br>2567A:p.T856K        | GTACCAACTATCCAA<br>GGCGAAC   | GAAGCTGACTAGGA<br>ACCACAGT   |
| chr12:1009690<br>C>T  | WNK1:NM_018979:exon26:c.C<br>6497T:p.T2166I       | AACACCCAGCCTATC<br>TATTGAGT  | AGAAAGGCTTGGA<br>CTGAAATGG   |
| chr17:40939485<br>C>A | WNK4:NM_032387:exon7:c.C1<br>666A:p.P556T         | TGGTTTTCTTCTCC<br>ATATCCT    | GTCTCAAGATCAGG<br>GGTGACTTA  |
| chr12:20522382<br>T>C | PDE3A:NM_000921:exon1:c.T1<br>64C:p.L55P          | AAACTTTCAGTGGAT<br>TGTGGGC   | AGAAGAAGGCACA<br>CAGGAGAC    |
| chr2:21225713<br>A>G  | APOB:NM_000384:exon29:c.T1<br>2581C:p.I4194T      | CCTCTGGGCTTCTTT<br>TGATAAAA  | TTGATGATATCGAC<br>GTGAGGTTT  |
| chr2:21263905<br>C>A  | APOB:NM_000384:exon4:c.G28<br>8T:p.Q96H           | ACAAATACTTACAGT<br>CACATCCGT | TTGATAAGGCATGT<br>GGTGTTGAG  |
| chr2:21255236<br>C>T  | APOB:NM_000384:exon10:c.G1<br>342A:p.A448T        | ATGCAAGCTGTAATA<br>CTTAGGGG  | CCTTCTGATAGATG<br>TGGTCACTT  |
| chr2:21229376<br>G>A  | APOB:NM_000384:exon26:c.C1<br>0364T:p.S3455F      | GAGGGAATATATGCG<br>TTGGAGTG  | GTGGAGGGTAGTCA<br>TAACAGTACT |
| chr2:21234872<br>C>T  | APOB:NM_000384:exon26:c.G4<br>868A:p.G1623D       | ACTGAATTTTGCATT<br>GTGTTCCC  | TTTGCCACTTCTAA<br>CAAGATGGA  |
| chr19:45411025<br>G>A | APOE:NM_000041:exon3:c.G52<br>A:p.A18T            | CCACCATGGCTCCAA<br>AGAAG     | GTAATCCCAAAAAGC<br>GACCCAG   |
| chr19:11224014<br>G>A | LDLR:NM_000527:exon9:c.G12<br>47A:p.R416Q         | CTAGCCTCAAGTGAT<br>CCTCCTC   | CAGTAGATTCTATT<br>GCTGGCCAC  |
| chr19:11221444<br>G>A | LDLR:NM_000527:exon7:c.G10<br>57A:p.E353K         | AATTAGCCTGTCATG<br>TTCGTGG   | ATGCAGGTGGAATC<br>TCATGAAAC  |
| chr1:55509520<br>C>A  | PCSK9:NM_174936:exon2:c.C2<br>12A:p.P71Q          | CAGAGGAAAACCTGT<br>TGTCGAG   | TCGCCACTCATCTT<br>CACCAG     |
| chr12:12334098<br>A>G | LRP6:NM_002336.2:exon1:c.T1<br>252C:p.Y418H       | AGTAGAGCTTCTTAC<br>CCAACCAT  | ACTGGACTGATGAT<br>GAAGTGAGG  |

|                         |                                                 |                                 |                              |
|-------------------------|-------------------------------------------------|---------------------------------|------------------------------|
| chr12:12397399<br>T>A   | LRP6:NM_002336:exon2:c.A24<br>6T:p.K82N         | CCACTTGAAGGATCT<br>AAGGCAAT     | CTGCGGTGGACTTT<br>GTGTTTAG   |
| chr2:27721143<br>G>A    | GCKR:NM_001486:exon4:c.G30<br>7A:p.V103M        | TAGTGGAGCAAGAC<br>ATGGGAG       | CAACATACTGGCGG<br>GACTCA     |
| chr2:27721171<br>G>A    | GCKR:NM_001486:exon4:c.G33<br>5A:p.R112Q        | TTGAACAAGTAGTGG<br>AGCAAGAC     | ATGGAATCTCGCAC<br>TTAAAGCTG  |
| chr11:11670713<br>6 T>C | APOA1:<br>NM_000039:exon4:c.201-9A>G            | ATCTCCTCCTGCCAC<br>TTCTTC       | AGGGGTGTTGGTTG<br>AGAGTG     |
| chr15:58837953<br>C>T   | LIPC:NM_000236:exon5:c.C587<br>T:p.A196V        | TGTCATTGTTAGCAC<br>CATGAACT     | TAGTGTCTATGGG<br>CTGTTTGTAT  |
| chr20:43043159<br>G>A   | HNF4A:NM_175914:exon5:c.G4<br>39A:p.V147I       | AGACTCCTTGGGGCT<br>CTAAAG       | CACGGCTATATCCC<br>AGGTGG     |
| chr20:43043143<br>G>A   | HNF4A:NM_175914:exon5:c.42<br>7-4G>A            | TGCCTCATTGTCAGA<br>AAAGGATG     | TAAAATCAAGCCAG<br>TCCACGG    |
| chr20:43043127<br>C>T   | HNF4A:NM_175914:exon5:c.42<br>7-20C>T           | GCCTCATTGTCAGAA<br>AAGGATGA     | CTTCATGGACTCAC<br>ACACATCTG  |
| chr17:36093774<br>G>T   | HNF1B:NM_000458:exon3:c.C5<br>85A:p.D195E       | GTGTTACCTGTTGCA<br>TTCTCC       | AAGCTTAGTTAGAC<br>GAGGGGAAT  |
| chr3:57286319<br>A>G    | APPL1:NM_012096:exon12:c.A<br>1075G:p.S359G     | AAAGTCTGCATCCTG<br>ATACCTCT     | TTGCTCGAGGACAA<br>TAGACTTTT  |
| chr3:57293081<br>G>A    | APPL1:NM_012096:exon16:c.G<br>1456A:p.G486R     | ATTGATCAGTTAGTG<br>TGTGAGGG     | TATGCTCCAGTACC<br>AGAAGAGAA  |
| chr9:135945901<br>A>G   | CEL:NM_001807:exon10:c.A13<br>49G:p.Y450C       | AAGCCCCATCTCTTC<br>ATGTGAA      | CCCGAAAACGTACT<br>GAATGTCAT  |
| chr9:135944184<br>G>A   | CEL:NM_001807:exon8:c.G103<br>0A:p.G344S        | CCCAAGTGTCCATAG<br>ATCAGAGA     | CTGCTTACTCCGTG<br>ACTTTCTTG  |
| chr12:12143411<br>7 C>A | HNF1A:NM_000545:exon5:c.C1<br>008A:p.S336R      | TTGGCAAAAGGTAGA<br>AACAAAGG     | AGGAAAGATGAGG<br>TTGGGTTTTT  |
| chr20:43043165<br>G>A   | HNF4A:NM_175914:exon5:c.G4<br>45A:p.G149R       | TGACAGACTCCTTGG<br>GGCTC        | CACTACTGCCACC<br>ATCCAC      |
| chr3:12447429<br>C>T    | PPARG:NM_005037:exon5:c.C5<br>84T:p.A195V       | GATGGTCTGTGCTAC<br>TTTTGTGA     | GTCTGTTGTCTTTCC<br>TGTCAGA   |
| chr19:15302649<br>C>T   | NOTCH3:NM_000435:exon5:c.<br>G709A:p.V237M      | AGCCATTGACACACA<br>CGCAG        | CACCCTCACCATGC<br>CGTAAC     |
| chr19:15298126<br>G>A   | NOTCH3:NM_000435:exon11:c.<br>C1630T:p.R544C    | CACTAGATGCACCAT<br>TCCCAA       | CAAATTCTGGAGCT<br>TGTAGTGGG  |
| chr19:15285063<br>G>T   | NOTCH3:NM_000435:exon25:c.<br>C4552A:p.L1518M   | ATGAAACACACAAG<br>ACCTGGATC     | GTACTCTACGGTGT<br>GAATGCATG  |
| chr19:15298066<br>C>T   | NOTCH3:NM_000435:exon11:c.<br>G1690A:p.A564T    | CCACTAGATGCACCA<br>TTCCCA       | GTGGAGTGGAAGTA<br>AGTGGGG    |
| chr19:15276215<br>C>T   | NOTCH3:NM_000435:exon31:c.<br>G5779A:p.A1927T   | ACTAGTGGTGACCCT<br>GCATG        | AACCGCTCTACAGA<br>CTTGGATG   |
| chr19:15289985<br>C>T   | NOTCH3:NM_000435:exon22:c.<br>G3569A:p.R1190H   | AGCATGTAGATCAGC<br>CACAATG      | TCTTCAATCCCTCTT<br>GACCACC   |
| chr19:15295229<br>C>T   | NOTCH3:NM_000435:exon16:c.<br>G2443A:p.A815T    | AGGCACACAGTTCAA<br>GCTTAATG     | TTATTTTGCCTTCAC<br>CCATCTCG  |
| chr 17:29548962<br>>T   | NF1:NM_001128147:exon15:c.1<br>737dupT:p.Y579fs | TGATTTCAATCTGTCT<br>GTATTATTCCC | TCATTCATCGAAAG<br>CATTGGTATT |
| chrX:100658972<br>C>G   | GLA:NM_000169:exon2:c.G196<br>C:p.E66Q          | AGTCCTCTGAATGAA<br>CAAGAACAT    | GGGCGGGAATATTA<br>ACGGGAT    |
| chr13:11116446<br>7 G>A | COL4A2:NM_001846:exon48:c.<br>G5068A:p.A1690T   | TTCATCGAATGCAAT<br>GGAGGC       | ATTGGAAAAGTGCAG<br>TGTTACAT  |
| chr13:11085088<br>9 G>T | COL4A1:NM_001845:exon21:c.<br>C1210A:p.P404T    | TCCACGCCTTTCTATT<br>ACACTCT     | CAGTGATGGTCTGG<br>TTGGATTTT  |
| chr13:11111792<br>0 C>T | COL4A2:NM_001846:exon25:c.<br>C1945T:p.P649S    | GAAAGGAAAACAGGG<br>AAGTTCGAG    | CAAAACAGCATCCT<br>CATCTGACT  |
| chr13:11107733<br>5 T>A | COL4A2:NM_001846:exon6:c.T<br>351A:p.D117E      | GAGACAAGGGTGAA<br>AGGGGAG       | TACGCACGTATAGT<br>CCCCAC     |
| chr13:11114208<br>3 A>C | COL4A2:NM_001846:exon36:c.<br>A3297C:p.L1099F   | CATGTGAGCCAATTT<br>CAGACCT      | TTCTTGACATTGG<br>ACTTGAAGA   |

|                             |                            |                 |                |
|-----------------------------|----------------------------|-----------------|----------------|
| chr13:11111117              | COL4A2:NM_001846:exon22:c. | GTCATAGTGCCCATC | GAGATAAAAGGCA  |
| 2 C>T                       | C1487T:p.P496L             | AGAACAG         | AGAACGGGAC     |
| 46,XY,t(15;22)(q24.2;q13.1) | der(15)                    | GATCACCTAGTTCAC | GCTGATACCCTGGC |
|                             |                            | ATCGCCA         | TTTGC          |
| 46,XY,t(15;22)(q24.2;q13.1) | der(22)                    | CGACGCTTCCTAAC  | AACTGGGCATGTGG |
|                             |                            | ACCAAAA         | TTAAAGAC       |

---

1  
2

**eTable 3. Frequency in public databases and prediction results of 59 rare SNVs and InDels**

| N <sup>o</sup> . | Subject No.       | Coordinate     | Variants                                 | Allele frequency in 92 patients | Category # | MAF in ChinaMAP | MAF in GnomA D EAS | MAF in European population from GnomA D | MAF in NCVD | SIFT      | Polyphen 2 HVAR   | Mutation Taster | CADD_p hred | Reported            | Remarks                                                                                  |
|------------------|-------------------|----------------|------------------------------------------|---------------------------------|------------|-----------------|--------------------|-----------------------------------------|-------------|-----------|-------------------|-----------------|-------------|---------------------|------------------------------------------------------------------------------------------|
| 1                | IS0025F           | chr12:992685   | WNK1:NM_018979:exon16:c.G3614A:p.G1205E  | 1/184                           | 1.1        | 9.44465E-05     | 0.000543656        | 0                                       | 0.000500167 | damaging  | possibly damaging | disease_causing | 21.3        | No                  | NA                                                                                       |
| 2                | IS0025F           | chr12:988932   | WNK1:NM_018979:exon11:c.C2567A:p.T856K   | 1/184                           | 1.1        | 0.000944465     | 0.001002506        | 0                                       | 0.001167056 | tolerated | possibly damaging | disease_causing | 23.2        | No                  | NA                                                                                       |
| 3                | IS0025F           | chr12:20522382 | PDE3A:NM_000921:exon1:c.T164C:p.L55P     | 1/184                           | 1.1        | 9.44465E-05     | 8.67303E-05        | 0                                       | NA          | damaging  | benign            | disease_causing | 18.33       | No                  | NA                                                                                       |
| 4                | IS0099F           | chr12:1009690  | WNK1:NM_018979:exon26:c.C6497T:p.T2166I  | 1/184                           | 1.1        | 0.001086135     | 0.000326193        | 0                                       | 0.000833611 | damaging  | possibly damaging | disease_causing | 28.2        | No                  | NA                                                                                       |
| 5                | ISP0019F, IS0039F | chr17:40939485 | WNK4:NM_032387:exon7:c.C1666A:p.P556T    | 2/184                           | 1.1        | 0.005289006     | 0.00491573         | 5.19798E-05                             | NA          | tolerated | benign            | polymorphism    | 0.005       | Yes, PMID: 15110905 | P556T variant was identified in two Japanese patients with hypertension or renal failure |
| 6                | ISP0026F          | chr2:21225713  | APOB:NM_000384:exon29:c.T12581C:p.I4194T | 1/184                           | 1.2        | 0.003777862     | 0.001555288        | 3.91676E-05                             | 0.003834612 | damaging  | benign            | polymorphism    | 7.556       | Yes, PMID: 27932355 | I4194T is a specific familial hypercholesterolemia mutation predicted in silico analysis |
| 7                | IS0016F           | chr2:21263905  | APOB:NM_000384:exon4:c.G288T:p.Q96H      | 1/184                           | 1.2        | 0.005714016     | 0.006117128        | 0                                       | 0.006335445 | tolerated | benign            | disease_causing | 23.9        | Yes, PMID: 27932355 | Q96H is a specific familial hypercholesterolemia mutation predicted in silico analysis   |
| 8                | IS0033F           | chr2:21255236  | APOB:NM_000384:exon10:c.G1342A:p.A448T   | 1/184                           | 1.2        | 0.000330563     | 0.000272005        | 7.43915E-06                             | NA          | tolerated | benign            | polymorphism    | 21.3        | Yes, PMID: 27932355 | A448T is a specific familial hypercholesterolemia mutation                               |

|        |              |                               |                                                  |       |     |                 |                 |                 |                 |              |                          |                     |       |                                                                              |                                                                                                                                                                                                                                                                                                                                        |
|--------|--------------|-------------------------------|--------------------------------------------------|-------|-----|-----------------|-----------------|-----------------|-----------------|--------------|--------------------------|---------------------|-------|------------------------------------------------------------------------------|----------------------------------------------------------------------------------------------------------------------------------------------------------------------------------------------------------------------------------------------------------------------------------------------------------------------------------------|
| 9      | IS0122B      | chr2:2<br>12293<br>76<br>G>A  | APOB:NM_000384:<br>exon26:c.C10364T:<br>p.S3455F | 1/184 | 1.2 | NA              | NA              | NA              | NA              | damagin<br>g | damagin<br>g             | disease_c<br>ausing | 23.4  | No                                                                           | predicted in<br>silico analysis<br>NA                                                                                                                                                                                                                                                                                                  |
| 1<br>0 | IS0013F      | chr2:2<br>12348<br>72<br>C>T  | APOB:NM_000384:<br>exon26:c.G4868A:p.<br>G1623D  | 1/184 | 1.2 | 0.00018<br>8893 | 0.00027<br>1976 | 0               | NA              | tolerated    | benign                   | disease_c<br>ausing | 23.6  | No                                                                           | NA                                                                                                                                                                                                                                                                                                                                     |
| 1<br>1 | IS0079F      | chr19:<br>45411<br>025<br>G>A | APOE:NM_000041:<br>exon3:c.G52A:p.A1<br>8T       | 1/184 | 1.2 | 0.00103<br>8912 | 0.00232<br>7464 | 0               | 0.00083<br>3611 | damagin<br>g | benign                   | polymorp<br>hism    | 20.2  | No                                                                           | NA                                                                                                                                                                                                                                                                                                                                     |
| 1<br>2 | IS0048F      | chr19:<br>11224<br>014<br>G>A | LDLR:NM_000527:<br>exon9:c.G1247A:p.<br>R416Q    | 1/184 | 1.2 | 4.72233<br>E-05 | 5.01505<br>E-05 | 2.59669<br>E-05 | NA              | damagin<br>g | possibly<br>damagin<br>g | disease_c<br>ausing | 26.4  | Yes,<br>PMID:<br>20506408,<br>22294733,<br>9452095,<br>15241806,<br>11810272 | The R416Q (also<br>known as<br>R395Q) variant<br>in LDLR has<br>been reported in<br>at least 84<br>individuals with<br>Familial<br>Hypercholesterol<br>emia;Missense<br>variants in the<br>same codon<br>(R416W, R416P,<br>R416L) have<br>been reported in<br>the HGMD in<br>association with<br>familial<br>hypercholesterol<br>emia. |
| 1<br>3 | ISP0070<br>F | chr19:<br>11221<br>444<br>G>A | LDLR:NM_000527:<br>exon7:c.G1057A:p.<br>E353K    | 1/184 | 1.2 | 0.00018<br>8893 | 0.00035<br>0948 | 3.90997<br>E-05 | NA              | tolerated    | possibly<br>damagin<br>g | disease_c<br>ausing | 23.1  | Yes,<br>PMID:<br>20506408;<br>16250003                                       | E353K variant<br>was referred<br>from the cascade<br>screening<br>program for<br>familial<br>hypercholesterol<br>emia.                                                                                                                                                                                                                 |
| 1<br>4 | IS0053F      | chr1:5<br>55095<br>20<br>C>A  | PCSK9:NM_174936<br>:exon2:c.C212A:p.P<br>71Q     | 1/184 | 1.2 | 4.72233<br>E-05 | NA              | NA              | NA              | tolerated    | benign                   | disease_c<br>ausing | 13.88 | Yes,<br>PMID:<br>26374825(<br>same<br>position,<br>but not the               | P71Q variant is<br>in the same<br>codon of P71L,<br>which is the<br>familial gain of<br>funcion<br>mutation.                                                                                                                                                                                                                           |



|        |                                 |                                |                                                 |       |     |                 |                 |                 |                 |              |                          |                     |       |                                               |                                                                                                                                                                                                    |
|--------|---------------------------------|--------------------------------|-------------------------------------------------|-------|-----|-----------------|-----------------|-----------------|-----------------|--------------|--------------------------|---------------------|-------|-----------------------------------------------|----------------------------------------------------------------------------------------------------------------------------------------------------------------------------------------------------|
| 1<br>5 | IS0012F                         | chr12:<br>12334<br>098<br>A>G  | LRP6:NM_002336.<br>2:exon1:c.T1252C:p<br>.Y418H | 1/184 | 1.2 | 0.00325<br>8406 | 0.00491<br>2281 | 0               | 0.00333<br>4445 | damagin<br>g | probably<br>damagin<br>g | disease_c<br>ausing | 26    | same<br>variant)<br>Yes,<br>PMID:<br>27455246 | Y418H variant is cosegregated the family with coronary artery disease and this variant significantly debilitated the Wnt3a-associated signaling pathway and impair the endothelial cell functions. |
| 1<br>6 | IS0025F,<br>IS0050F,<br>IS0103F | chr12:<br>12397<br>399<br>T>A  | LRP6:NM_002336:<br>exon2:c.A246T:p.K<br>82N     | 2/184 | 1.2 | 0.00325<br>8406 | 0.00410<br>9864 | 0               | 0.00450<br>1501 | tolerated    | benign                   | disease_c<br>ausing | 17.33 | Yes,<br>PMID:<br>24427284                     | The in vitro functional analysis revealed that K82N variant resulted in a significant reduction in both protein level transporting to cell membrane and downstream Wnt signal activity.            |
| 1<br>7 | IS0003F                         | chr2:2<br>77211<br>43<br>G>A   | GCKR:NM_001486<br>:exon4:c.G307A:p.V<br>103M    | 1/184 | 1.2 | 0.01010<br>578  | 0.00862<br>5013 | 2.59306<br>E-05 | 0.00766<br>9223 | damagin<br>g | probably<br>damagin<br>g | disease_c<br>ausing | 23    | Yes,<br>PMID:<br>22182842                     | V103M variant is detected in the ClinSeq cohort and shows significantly reduced inhibition of glucokinase in vitro                                                                                 |
| 1<br>8 | IS0071F                         | chr2:<br>27721<br>171<br>G>A   | GCKR:NM_001486<br>:exon4:c.G335A:p.R<br>112Q    | 1/184 | 1.2 | NA              | 5.01303<br>E-05 | 1.94542<br>E-05 | NA              | damagin<br>g | probably<br>damagin<br>g | polymorp<br>hism    | 28.7  | No                                            | NA                                                                                                                                                                                                 |
| 1<br>9 | IS0013F                         | chr11:<br>11670<br>7136<br>T>C | APOA1:<br>NM_000039:exon4:<br>c.201-9A>G,       | 1/184 | 1.2 | 0.00066<br>1126 | 0.00141<br>4427 | 0               | 0.00133<br>3778 | -            | -                        | -                   | -     | No                                            | NA                                                                                                                                                                                                 |

|        |                                      |                               |                                               |       |     |                 |                 |                 |                 |              |                          |                         |       |                           |                                                                                                                                                                                                                                                                                                              |
|--------|--------------------------------------|-------------------------------|-----------------------------------------------|-------|-----|-----------------|-----------------|-----------------|-----------------|--------------|--------------------------|-------------------------|-------|---------------------------|--------------------------------------------------------------------------------------------------------------------------------------------------------------------------------------------------------------------------------------------------------------------------------------------------------------|
| 2<br>0 | IS0011F                              | chr15:<br>58837<br>953<br>C>T | LIPC:NM_000236:<br>exon5:c.C587T:p.A1<br>96V  | 1/184 | 1.2 | NA              | 0.00010<br>0241 | 0               | NA              | damagin<br>g | probably<br>damagin<br>g | disease_c<br>ausin<br>g | 29.1  | No                        | NA                                                                                                                                                                                                                                                                                                           |
| 2<br>1 | IS0016F,<br>IS0145B,<br>ISP0057<br>B | chr20:<br>43043<br>159<br>G>A | HNF4A:NM_17591<br>4:exon5:c.G439A:p.<br>V147I | 3/184 | 1.3 | 0.00382<br>5085 | 0.00180<br>415  | 0.00021<br>3977 | 0.00266<br>7556 | tolerated    | benign                   | polymorp<br>hism        | 5.767 | Yes,<br>PMID:152<br>81001 | HNF4A:NM_17<br>5914:exon5:c.G4<br>39A:p.V147I,<br>c.426+703G>A<br>and c.427-<br>20C>T has been<br>identified in a<br>Philippino<br>family with<br>autosomal<br>dominant early-<br>onset type 2<br>diabetes and<br>cosegregated<br>with 3 affected<br>available<br>siblings, age of<br>onset from 31 to<br>46 |
| 2<br>2 | IS0016F,<br>IS0145B,<br>ISP0057<br>B | chr20:<br>43043<br>143<br>G>A | HNF4A:NM_17591<br>4:exon5:c.427-<br>4G>A      | 3/184 | 1.3 | 0.00377<br>7862 | 0.00175<br>421  | 0.00014<br>9194 | 0.00266<br>7556 | NA           | NA                       | NA                      | NA    | Yes,<br>PMID:152<br>81001 | HNF4A:NM_17<br>5914:exon5:c.G4<br>39A:p.V147I,<br>c.426+703G>A<br>and c.427-<br>20C>T has been<br>identified in a<br>Philippino<br>family with<br>autosomal<br>dominant early-<br>onset type 2<br>diabetes and<br>cosegregated<br>with 3 affected<br>available<br>siblings, age of<br>onset from 31 to<br>46 |
| 2<br>3 | IS0016F,<br>IS0145B,<br>ISP0057<br>B | chr20:<br>43043<br>127<br>C>T | HNF4A:NM_17591<br>4:exon5:c.427-<br>20C>T     | 3/184 | 1.3 | 0.00377<br>7862 | 0.00180<br>433  | 0               | 0.00266<br>7556 | NA           | NA                       | NA                      | NA    | Yes,<br>PMID:152<br>81001 | HNF4A:NM_17<br>5914:exon5:c.G4<br>39A:p.V147I,<br>c.426+703G>A<br>and c.427-<br>20C>T has been<br>identified in a                                                                                                                                                                                            |

|        |              |                                |                                                 |       |     |                 |                 |                 |                 |              |                          |                         |       |                           |                                                                                                                                                                                               |
|--------|--------------|--------------------------------|-------------------------------------------------|-------|-----|-----------------|-----------------|-----------------|-----------------|--------------|--------------------------|-------------------------|-------|---------------------------|-----------------------------------------------------------------------------------------------------------------------------------------------------------------------------------------------|
| 2<br>4 | IS0027F      | chr17:<br>36093<br>774<br>G>T  | HNF1B:NM_00045<br>8:exon3:c.C585A:p.<br>D195E   | 1/184 | 1.3 | NA              | 0               | 7.38989<br>E-06 | NA              | NA           | probably<br>damagin<br>g | disease_c<br>ausin<br>g | 13.92 | No                        | Philippino<br>family with<br>autosomal<br>dominant early-<br>onset type 2<br>diabetes and<br>cosegregated<br>with 3 affected<br>available<br>siblings, age of<br>onset from 31 to<br>46<br>NA |
| 2<br>5 | IS0025F      | chr12:<br>12143<br>4117<br>C>A | HNF1A:NM_00054<br>5:exon5:c.C1008A:p<br>.S336R  | 1/184 | 1.3 | 4.72233<br>E-05 | 0.00027<br>1887 | 0               | 0.00033<br>3444 | tolerated    | possibly<br>damagin<br>g | disease_c<br>ausin<br>g | 21.8  | No                        | NA                                                                                                                                                                                            |
| 2<br>6 | IS0103F      | chr20:<br>43043<br>165<br>G>A  | HNF4A:NM_17591<br>4:exon5:c.G445A:p.<br>G149R   | 1/184 | 1.3 | 0.00018<br>8893 | 0.00020<br>0461 | 3.24179<br>E-05 | NA              | tolerated    | benign                   | disease_c<br>ausin<br>g | 24    | no                        | NA                                                                                                                                                                                            |
| 2<br>7 | IS0024F      | chr3:5<br>72863<br>19<br>A>G   | APPL1:NM_012096<br>:exon12:c.A1075G:p<br>.S359G | 1/184 | 1.3 | NA              | NA              | NA              | NA              | tolerated    | benign                   | disease_c<br>ausin<br>g | 24.2  | No                        | NA                                                                                                                                                                                            |
| 2<br>8 | IS0053F      | chr3:5<br>72930<br>81<br>G>A   | APPL1:NM_012096<br>:exon16:c.G1456A:p<br>.G486R | 1/184 | 1.3 | NA              | 0.00021<br>8341 | 0               | 0.00016<br>6722 | damagin<br>g | benign                   | disease_c<br>ausin<br>g | 23.3  | No                        | NA                                                                                                                                                                                            |
| 2<br>9 | IS0013F      | chr9:1<br>35945<br>901<br>A>G  | CEL:NM_001807:e<br>xon10:c.A1349G:p.<br>Y450C   | 1/184 | 1.3 | NA              | 0.00027<br>8118 | 2.22628<br>E-05 | NA              | damagin<br>g | probably<br>damagin<br>g | disease_c<br>ausin<br>g | 23.3  | No                        | NA                                                                                                                                                                                            |
| 3<br>0 | IS0068F      | chr9:1<br>35944<br>184<br>G>A  | CEL:NM_001807:e<br>xon8:c.G1030A:p.G<br>344S    | 1/184 | 1.3 | NA              | NA              | NA              | NA              | damagin<br>g | probably<br>damagin<br>g | disease_c<br>ausin<br>g | 28.1  | No                        | NA                                                                                                                                                                                            |
| 3<br>1 | ISP0063<br>F | chr3:<br>12447<br>429<br>C>T   | PPARG:NM_00503<br>7:exon5:c.C584T:p.<br>A195V   | 1/184 | 1.3 | NA              | 0.00016<br>3185 | 0               | NA              | damagin<br>g | possibly<br>damagin<br>g | disease_c<br>ausin<br>g | 34    | No                        | NA                                                                                                                                                                                            |
| 3<br>2 | IS0035F      | chr19:<br>15302<br>649<br>C>T  | NOTCH3:NM_0004<br>35:exon5:c.G709A:p<br>.V237M  | 1/184 | 2   | 0.00382<br>5085 | 0.00235<br>6362 | 2.60335<br>E-05 | 0.00633<br>5445 | damagin<br>g | benign                   | disease_c<br>ausin<br>g | 26.7  | Yes,<br>PMID:124<br>80761 | NOTCH3:<br>V237M variant<br>was detected in a<br>Japanese patient<br>with CADASIL                                                                                                             |

|   |          |        |                    |       |   |         |         |         |         |           |          |           |      |          |                   |
|---|----------|--------|--------------------|-------|---|---------|---------|---------|---------|-----------|----------|-----------|------|----------|-------------------|
| 3 | IS0050F, | chr19: | NOTCH3:NM_0004     | 2/184 | 2 | 0.00033 | 0.00396 | 0       | 0.00033 | tolerated | possibly | disease_c | 24.7 | Yes,     | NOTCH3            |
| 3 | IS0145B  | 15298  | 35:exon11:c.C1630  |       |   | 0563    | 666     |         | 3444    |           | damagin  | ausing    |      | PMID:103 | c.1630C>T         |
|   |          | 126    | T:p.R544C          |       |   |         |         |         |         |           | g        |           |      | 71548    | (p.Arg544Cys)     |
|   |          | G>A    |                    |       |   |         |         |         |         |           |          |           |      |          | missense variant  |
|   |          |        |                    |       |   |         |         |         |         |           |          |           |      |          | has been          |
|   |          |        |                    |       |   |         |         |         |         |           |          |           |      |          | reported          |
|   |          |        |                    |       |   |         |         |         |         |           |          |           |      |          | extensively in    |
|   |          |        |                    |       |   |         |         |         |         |           |          |           |      |          | the literature,   |
|   |          |        |                    |       |   |         |         |         |         |           |          |           |      |          | particularly in   |
|   |          |        |                    |       |   |         |         |         |         |           |          |           |      |          | individuals       |
|   |          |        |                    |       |   |         |         |         |         |           |          |           |      |          | affected with     |
|   |          |        |                    |       |   |         |         |         |         |           |          |           |      |          | cerebral          |
|   |          |        |                    |       |   |         |         |         |         |           |          |           |      |          | autosomal         |
|   |          |        |                    |       |   |         |         |         |         |           |          |           |      |          | dominant          |
|   |          |        |                    |       |   |         |         |         |         |           |          |           |      |          | arteriopathy with |
|   |          |        |                    |       |   |         |         |         |         |           |          |           |      |          | subcortical       |
|   |          |        |                    |       |   |         |         |         |         |           |          |           |      |          | infarcts and      |
|   |          |        |                    |       |   |         |         |         |         |           |          |           |      |          | leukoencephalop   |
|   |          |        |                    |       |   |         |         |         |         |           |          |           |      |          | athy (CADASIL)    |
|   |          |        |                    |       |   |         |         |         |         |           |          |           |      |          | of Asian descent, |
|   |          |        |                    |       |   |         |         |         |         |           |          |           |      |          | where the variant |
|   |          |        |                    |       |   |         |         |         |         |           |          |           |      |          | appears to be a   |
|   |          |        |                    |       |   |         |         |         |         |           |          |           |      |          | founder variant   |
| 3 | IS0007F, | chr19: | NOTCH3:NM_0004     | 3/184 | 2 | 0.00765 | 0.00670 | 0.00038 | 0.00850 | damagin   | probably | disease_c | 27.8 | Yes,     | NOTCH3            |
| 4 | ISP0019  | 15285  | 35:exon25:c.C4552  |       |   | 0893    | 0702    | 111     | 2834    | g         | damagin  | ausing    |      | PMID:220 | L1518M was        |
|   | F,       | 063    | A:p.L1518M         |       |   |         |         |         |         |           | g        |           |      | 06983    | predicted as      |
|   | ISP0023  | G>T    |                    |       |   |         |         |         |         |           |          |           |      |          | functional but in |
|   | F        |        |                    |       |   |         |         |         |         |           |          |           |      |          | small vessel      |
|   |          |        |                    |       |   |         |         |         |         |           |          |           |      |          | disease patient   |
|   |          |        |                    |       |   |         |         |         |         |           |          |           |      |          | NA                |
| 3 | IS0047F  | chr19: | NOTCH3:NM_0004     | 1/184 | 2 | 0.00118 | 0.00125 | 4.54734 | 0.00100 | tolerated | probably | disease_c | 27.8 | No       | NA                |
| 5 |          | 15298  | 35:exon11:c.G1690  |       |   | 0582    | 439     | E-05    | 0333    |           | damagin  | ausing    |      |          |                   |
|   |          | 066    | A:p.A564T          |       |   |         |         |         |         |           | g        |           |      |          |                   |
|   |          | C>T    |                    |       |   |         |         |         |         |           |          |           |      |          |                   |
| 3 | IS0028F  | chr19: | NOTCH3:NM_0004     | 1/184 | 2 | 0.00023 | 0.00043 | 2.27218 | 0.00133 | tolerated | benign   | disease_c | 23   | No       | NA                |
| 6 |          | 15276  | 35:exon31:c.G5779  |       |   | 6116    | 5019    | E-05    | 3778    |           |          | ausing    |      |          |                   |
|   |          | 215    | A:p.A1927T         |       |   |         |         |         |         |           |          |           |      |          |                   |
|   |          | C>T    |                    |       |   |         |         |         |         |           |          |           |      |          |                   |
| 3 | IS0044F  | chr19: | NOTCH3:NM_0004     | 1/184 | 2 | 9.44465 | 0       | 6.51755 | NA      | tolerated | probably | disease_c | 24.3 | No       | NA                |
| 7 |          | 15289  | 35:exon22:c.G3569  |       |   | E-05    |         | E-06    |         |           | damagin  | ausing    |      |          |                   |
|   |          | 985    | A:p.R1190H         |       |   |         |         |         |         |           | g        |           |      |          |                   |
|   |          | C>T    |                    |       |   |         |         |         |         |           |          |           |      |          |                   |
| 3 | IS0106F  | chr19: | NOTCH3:NM_0004     | 1/184 | 2 | NA      | 0.00010 | 0       | NA      | tolerated | benign   | disease_c | 20.3 | No       | NA                |
| 8 |          | 15295  | 35:exon16:c.G2443  |       |   |         | 8814    |         |         |           |          | ausing    |      |          |                   |
|   |          | 229    | A:p.A815T          |       |   |         |         |         |         |           |          |           |      |          |                   |
|   |          | C>T    |                    |       |   |         |         |         |         |           |          |           |      |          |                   |
| 3 | IS0119F  | chr17: | NF1:NM_00112814    | 1/184 | 2 | NA      | 0.00069 | 0       | 0.00033 | -         | -        | -         | -    | No       | NA                |
| 9 |          | 29548  | 7:exon15:c.1737dup |       |   |         | 9526    |         | 3444    |           |          |           |      |          |                   |
|   |          | 962    | T:p.Y579fs         |       |   |         |         |         |         |           |          |           |      |          |                   |
|   |          | ->T    |                    |       |   |         |         |         |         |           |          |           |      |          |                   |

|        |                                      |                                |                                               |       |   |                 |                 |                 |                 |           |                      |                     |       |                                        |                                                                                                                              |
|--------|--------------------------------------|--------------------------------|-----------------------------------------------|-------|---|-----------------|-----------------|-----------------|-----------------|-----------|----------------------|---------------------|-------|----------------------------------------|------------------------------------------------------------------------------------------------------------------------------|
| 4<br>0 | IS0059F                              | chrX:<br>10065<br>8972<br>C>G  | GLA:NM_000169:exon2:c.G196C:p.E66Q            | 1/184 | 2 | NA              | 0.00147<br>9987 | 0               | NA              | damaging  | possibly<br>damaging | disease_c<br>ausing | 25.4  | Yes,<br>PMID:<br>1315715;2<br>6456105  | Peng et al. suggested that the GLA E66Q variant could be one of the genetic causes of the Chinese renal variant FD pedigree. |
| 4<br>1 | IS0004F                              | chr13:<br>11116<br>4467<br>G>A | COL4A2:NM_001846:exon48:c.G5068A:p.A1690T     | 1/184 | 2 | 0.00089<br>7242 | 0.00199<br>8565 | 3.26426<br>E-05 | 0.00100<br>0333 | damaging  | possibly<br>damaging | polymorphism        | 22.8  | Yes,<br>PMID:<br>22209247              | COL4A2 p.A1690T variant was found in a intracerebral hemorrhage patient. This mutation can cause expense of their secretion. |
| 4<br>2 | IS0152B                              | chr13:<br>11085<br>0889<br>G>T | COL4A1:NM_001845:exon21:c.C1210A:p.P404T      | 1/184 | 2 | NA              | 0.00016<br>3221 | 0               | NA              | tolerated | possibly<br>damaging | disease_c<br>ausing | 15.13 | No                                     | NA                                                                                                                           |
| 4<br>3 | IS0017F;<br>IS0060F;<br>ISP0026<br>F | chr13:<br>11111<br>7920<br>C>T | COL4A2:NM_001846:exon25:c.C1945T:p.P649S      | 3/184 | 2 | 0.00103<br>8912 | 0.00205<br>2545 | 0               | 0.00116<br>7056 | tolerated | probably<br>damaging | disease_c<br>ausing | 19.57 | No                                     | NA                                                                                                                           |
| 4<br>4 | IS0058                               | chr13:<br>11107<br>7335<br>T>A | COL4A2:NM_001846:exon6:c.T351A:p.D117E        | 1/184 | 2 | NA              | 5.56235<br>E-05 | 0               | NA              | tolerated | probably<br>damaging | disease_c<br>ausing | 26.6  | No                                     | NA                                                                                                                           |
| 4<br>5 | IS0068F                              | chr13:<br>11114<br>2083<br>A>C | COL4A2:NM_001846:exon36:c.A3297C:p.L1099F     | 1/184 | 2 | 0.00042<br>5009 | 0.00044<br>5087 | 0               | 0.00033<br>3444 | damaging  | probably<br>damaging | disease_c<br>ausing | 9.484 | No                                     | NA                                                                                                                           |
| 4<br>6 | IS0084F                              | chr13:<br>11111<br>1172<br>C>T | COL4A2:NM_001846:exon22:c.C1487T:p.P496L      | 1/184 | 2 | 0.00051<br>9456 | 0.00087<br>1259 | 0               | 0.00033<br>3444 | damaging  | probably<br>damaging | disease_c<br>ausing | 26.9  | No                                     | NA                                                                                                                           |
| 4<br>7 | IS0021F                              | chr17:<br>78350<br>324<br>T>A  | RNF213:NM_001256071:exon52:c.T13409A:p.F4470Y | 1/184 | 2 | 9.44465<br>E-05 | 0.00027<br>1828 | 0               | 0.00033<br>3444 | tolerated | probably<br>damaging | polymorphism        | 25.2  | No                                     | NA                                                                                                                           |
| 4<br>8 | IS0024F                              | chr17:<br>78360<br>549<br>G>A  | RNF213:NM_001256071:exon63:c.G14780A:p.R4927Q | 1/184 | 2 | 0.00033<br>0563 | 0.00025<br>0652 | 8.4281E<br>-05  | NA              | tolerated | benign               | polymorphism        | 25.3  | Yes,<br>PMID:<br>25964206;<br>30671466 | R4927Q is a rare missense variant in Japanese Moyamoya disease patients                                                      |

|    |                     |                       |                                               |       |   |             |             |             |             |           |                   |                 |       |                                                     |                                                                                                                                                                       |
|----|---------------------|-----------------------|-----------------------------------------------|-------|---|-------------|-------------|-------------|-------------|-----------|-------------------|-----------------|-------|-----------------------------------------------------|-----------------------------------------------------------------------------------------------------------------------------------------------------------------------|
| 49 | IS0027F             | chr17:78346850<br>G>A | RNF213:NM_001256071:exon49:c.G12827A:p.R4276Q | 1/184 | 2 | 4.72233E-05 | 0           | 3.24958E-05 | NA          | tolerated | possibly damaging | polymorphism    | 25    | No                                                  | NA                                                                                                                                                                    |
| 50 | IS0028F             | chr17:78298836<br>A>G | RNF213:NM_001256071:exon18:c.A3031G:p.T1011A  | 1/184 | 2 | NA          | NA          | NA          | NA          | damaging  | possibly damaging | polymorphism    | 12.36 | No                                                  | NA                                                                                                                                                                    |
| 51 | IS0039F             | chr17:78332222<br>T>C | RNF213:NM_001256071:exon37:c.T10997C:p.M3666T | 1/184 | 2 | 0.00273895  | 0.004410143 | 0           | 0.002334111 | damaging  | probably damaging | disease_causing | 27.3  | Yes,<br>PMID:<br>26530418;<br>27128593              | M3666T is a rare missense variant detected in Chinese Moyamoya disease patients                                                                                       |
| 52 | IS0042F             | chr17:78360097<br>G>A | RNF213:NM_001256071:exon62:c.G14587A:p.D4863N | 1/184 | 2 | 0.002219494 | 0.0008529   | 0           | 0.001833945 | tolerated | benign            | polymorphism    | 23    | Yes,<br>PMID:<br>21799892,<br>29160859,<br>30925911 | D4863N is particularly identified in Chinese Moyamoya disease patients. This variant also significantly associated with intracranial major artery stenosis/occlusion. |
| 53 | IS0051F;<br>IS0110B | chr17:78360619<br>G>C | RNF213:NM_001256071:exon63:c.G14850C:p.E4950D | 2/184 | 2 | 0.002786173 | 0.002656642 | 0           | 0.002167389 | tolerated | benign            | polymorphism    | 12.41 | Yes,<br>PMID:<br>21799892,<br>29165161;<br>30925911 | E4950D is particularly identified in Chinese Moyamoya disease patients. This variant also significantly associated with intracranial major artery stenosis/occlusion. |
| 54 | IS0141B             | chr17:78363034<br>C>T | RNF213:NM_001256071:exon65:c.C15062T:p.A5021V | 1/184 | 2 | 0.008311296 | 0.004259798 | 0           | 0.004001334 | tolerated | benign            | polymorphism    | 13.23 | Yes,<br>PMID:<br>29165161;<br>30925911              | A5021V is significantly associated with MMD in Chinese population in the pooled analysis.                                                                             |
| 55 | IS0049F             | chr17:78286           | RNF213:NM_001256071:exon15:c.G2739A:p.W913X   | 1/184 | 2 | NA          | NA          | NA          | NA          | -         | -                 | -               | 35    | No                                                  | NA                                                                                                                                                                    |

|   |         |                               |                                       |       |   |    |                 |                 |    |              |                          |                    |       |    |    |
|---|---------|-------------------------------|---------------------------------------|-------|---|----|-----------------|-----------------|----|--------------|--------------------------|--------------------|-------|----|----|
| 5 | IS0071F | 895<br>G>A<br>chr17:<br>78313 | RNF213:NM_00125<br>6071:exon26:c.C490 | 1/184 | 2 | NA | 9.41265<br>E-05 | 3.20605<br>E-05 | NA | damagin<br>g | -                        | polymorp<br>hism   | 22.1  | No | NA |
| 6 |         | 074<br>C>T                    | 7T:p.T1636M                           |       |   |    |                 |                 |    |              |                          |                    |       |    |    |
| 5 | IS0147B | chr17:<br>78320               | RNF213:NM_00125<br>6071:exon29:c.G836 | 1/184 | 2 | NA | NA              | NA              | NA | damagin<br>g | possibly<br>damagin<br>g | disease_c<br>ausin | 24.3  | No | NA |
| 7 |         | 498                           | 3A:p.G2788D                           |       |   |    |                 |                 |    |              |                          |                    |       |    |    |
| 5 | ISP0009 | chr17:<br>78268               | RNF213:NM_00125<br>6071:exon9:c.G1588 | 1/184 | 2 | NA | 0               | 2.95425<br>E-05 | NA | damagin<br>g | possibly<br>damagin<br>g | polymorp<br>hism   | 17.82 | No | NA |
| 8 | F       | 635<br>G>A                    | A:p.A530T                             |       |   |    |                 |                 |    |              |                          |                    |       |    |    |
| 5 | ISP0057 | chr17:<br>78343               | RNF213:NM_00125<br>6071:exon46:c.G123 | 1/184 | 2 | NA | 0               | 2.96314<br>E-05 | NA | damagin<br>g | probably<br>damagin<br>g | disease_c<br>ausin | 35    | No | NA |
| 9 | B       | 634<br>G>A                    | 92A:p.R4131H                          |       |   |    |                 |                 |    |              |                          |                    |       |    |    |

MAF: Minor allele frequency

ChinaMAP: Chinese subjects with metabolic traits and diseases

NCVD: Nyuwa Chinese Population Variant Database

#Category 1.1: Gene variations related to vascular risk factors: Hypertension; Category 1.2: Gene variations related to vascular risk factors: dyslipidemia; Category 1.3: Gene variations related to vascular risk factors: diabetes; Category 2: Gene variations related to other stroke subtypes.

**eTable 4. The VRFs profile for patients with VRFs-related variants**

| Study No | Sex    | Age at onset of stroke | Diabetes# | Diabetes related variants | Hypertension# | Hypertension related variants | Dyslipidemia# | Dyslipidemia related variants | VRF-related variants                                                                                                                                                                                       | Consistency of Genetic Results with the Baseline Assessment for VRFs |
|----------|--------|------------------------|-----------|---------------------------|---------------|-------------------------------|---------------|-------------------------------|------------------------------------------------------------------------------------------------------------------------------------------------------------------------------------------------------------|----------------------------------------------------------------------|
| IS0003F  | Male   | 59                     | No        | No                        | No            | No                            | Yes*          | Yes*                          | GCKR:NM_001486:exon4:c.G307A:p.V103M                                                                                                                                                                       | Y                                                                    |
| IS0011F  | Female | 65                     | No        | No                        | Yes           | No                            | Yes*          | Yes*                          | LIPC:NM_000236:exon5:c.C587T:p.A196V                                                                                                                                                                       | Y                                                                    |
| IS0012F  | Male   | 58                     | No        | No                        | Yes           | No                            | Yes*          | Yes*                          | LRP6:NM_002336.2:exon1:c.T1252C:p.Y418H                                                                                                                                                                    | Y                                                                    |
| IS0013F  | Female | 71                     | No        | Yes                       | No            | No                            | Yes*          | Yes*                          | APOB:NM_000384:exon26:c.G4868A:p.G1623D<br>APOA1: NM_000039:exon4:c.201-9A>G<br>CEL:NM_001807:exon10:c.A1349G:p.Y450C                                                                                      | N,P                                                                  |
| IS0016F  | Male   | 68                     | No        | Yes                       | Yes           | No                            | Yes*          | Yes*                          | APOB:NM_000384:exon4:c.G288T:p.Q96H<br>HNF4A:NM_175914:exon5:c.G439A:p.V147I<br>HNF4A:NM_175914:exon5:c.427-4G>A<br>HNF4A:NM_175914:exon5:c.427-20C>T                                                      | N,P                                                                  |
| IS0024F  | Male   | 55                     | No        | Yes                       | Yes           | No                            | Yes           | No                            | APPL1:NM_012096:exon12:c.A1075G:p.S359G                                                                                                                                                                    | N                                                                    |
| IS0025F  | Male   | 61                     | Yes*      | Yes*                      | Yes*          | Yes*                          | Yes*          | Yes*                          | WNK1:NM_018979:exon16:c.G3614A:p.G1205E<br>WNK1:NM_018979:exon11:c.C2567A:p.T856K<br>PDE3A:NM_000921:exon1:c.T164C:p.L55P<br>LRP6:NM_002336:exon2:c.A246T:p.K82N<br>HNF1A:NM_000545:exon5:c.C1008A:p.S336R | Y                                                                    |
| IS0027F  | Female | 54                     | Yes*      | Yes*                      | Yes           | No                            | Yes           | No                            | HNF1B:NM_000458:exon3:c.C585A:p.D195E                                                                                                                                                                      | Y                                                                    |
| IS0033F  | Male   | 65                     | No        | No                        | No            | No                            | No            | Yes                           | APOB:NM_000384:exon10:c.G1342A:p.A448T                                                                                                                                                                     | N                                                                    |



|          |        |    |      |      |      |      |      |      |                                           |     |
|----------|--------|----|------|------|------|------|------|------|-------------------------------------------|-----|
| IS0039F  | Male   | 75 | No   | No   | No   | Yes  | No   | No   | WNK4:NM_032387:exon7:c.C1666 A:p.P556T    | N   |
| IS0048F  | Male   | 73 | No   | No   | Yes  | No   | Yes* | Yes* | LDLR:NM_000527:exon9:c.G1247A :p.R416Q    | Y   |
| IS0050F  | Male   | 79 | Yes  | No   | Yes  | No   | Yes* | Yes* | LRP6:NM_002336:exon2:c.A246T:p. K82N      | Y   |
| IS0053F  | Female | 57 | No   | Yes  | Yes  | No   | Yes* | Yes* | PCSK9:NM_174936:exon2:c.C212A: p.P71Q     | N,P |
| IS0068F  | Male   | 54 | No   | Yes  | Yes  | No   | No   | No   | APPL1:NM_012096:exon16:c.G1456 A:p.G486R  | N   |
| IS0071F  | Male   | 49 | Yes  | No   | Yes  | No   | No   | Yes  | CEL:NM_001807:exon8:c.G1030A:p .G344S     | N   |
| IS0079F  | Female | 45 | Yes  | No   | No   | No   | Yes* | Yes* | GCKR:NM_001486:exon4:c.G335A: p.R112Q     | N   |
| IS0099F  | Male   | 47 | No   | No   | No   | Yes  | Yes  | No   | APOE:NM_000041:exon3:c.G52A:p. A18T       | Y   |
| IS0103F  | Male   | 40 | Yes* | Yes* | Yes  | No   | Yes* | Yes* | WNK1:NM_018979:exon26:c.C6497 T:p.T2166I  | N   |
| IS0122B  | Female | 55 | No   | No   | No   | No   | Yes* | Yes* | LRP6:NM_002336:exon2:c.A246T:p. K82N      | Y   |
| IS0145B  | Male   | 57 | Yes* | Yes* | No   | No   | Yes  | No   | HNF4A:NM_175914:exon5:c.G445A :p.G149R    | Y   |
| ISP0019F | Male   | 75 | Yes  | No   | Yes* | Yes* | Yes  | No   | APOB:NM_000384:exon26:c.C1036 4T:p.S3455F | Y   |
| ISP0026F | Male   | 69 | No   | No   | No   | No   | Yes* | Yes* | HNF4A:NM_175914:exon5:c.G439A :p.V147I    | Y   |
| ISP0057B | Male   | 62 | Yes* | Yes* | Yes  | No   | Yes  | No   | HNF4A:NM_175914:exon5:c.427- 4G>A         | Y   |
| ISP0063F | Male   | 63 | No   | Yes  | Yes  | No   | No   | No   | HNF4A:NM_175914:exon5:c.427- 20C>T        | N   |
|          |        |    |      |      |      |      |      |      | Wnk4:NM_032387:exon7:c.C1666 A:p.P556T    | Y   |
|          |        |    |      |      |      |      |      |      | APOB:NM_000384:exon29:c.T1258 1C:p.I4194T | Y   |
|          |        |    |      |      |      |      |      |      | HNF4A:NM_175914:exon5:c.G439A :p.V147I    | Y   |
|          |        |    |      |      |      |      |      |      | HNF4A:NM_175914:exon5:c.427- 4G>A         | Y   |
|          |        |    |      |      |      |      |      |      | HNF4A:NM_175914:exon5:c.427- 20C>T        | N   |
|          |        |    |      |      |      |      |      |      | PPARG:NM_005037:exon5:c.C584T :p.A195V    | N   |

---

|          |        |    |    |    |     |    |      |      |                                           |   |
|----------|--------|----|----|----|-----|----|------|------|-------------------------------------------|---|
| ISP0070F | Female | 64 | No | No | Yes | No | Yes* | Yes* | LDLR:NM_000527:exon7:c.G1057A<br>:p.E353K | Y |
|----------|--------|----|----|----|-----|----|------|------|-------------------------------------------|---|

---

#: Y/N: The patient had or did not have this phenotype

\*: The genotype which was consistent with the phenotype.

VRF: Vascular risk factors (Hypertension; Diabetes; Dyslipidemia)

^: Y: Yes; N: No; N,P: partially consistent

**eTable 5. Rare aneuploidies /CNVs and structural rearrangements in eight symptomatic ICAD patients**

| Sample Name  | Gender | Age at Stroke Onset | Hypertension# | Diabetes# | Dyslipidemia# | Variant*                                                                                                                                                                                           |
|--------------|--------|---------------------|---------------|-----------|---------------|----------------------------------------------------------------------------------------------------------------------------------------------------------------------------------------------------|
| ISP002<br>6F | Male   | 69                  | N             | N         | Y             | seq[GCRh37] del(10)(10q11.22q11.23) chr10:g.46582529_51595727del                                                                                                                                   |
| IS0016<br>F  | Male   | 68                  | Y             | N         | Y             | seq[GCRh37] mos del(2)(p23.3) chr2:g.25251700_26670643del;                                                                                                                                         |
| IS0004<br>F  | Male   | 69                  | Y             | Y         | Y             | 45,X/46,XY (50%)                                                                                                                                                                                   |
| IS0032<br>F  | Male   | 64                  | Y             | N         | Y             | 45,X/46,XY (15.4%)                                                                                                                                                                                 |
| IS0060<br>F  | Male   | 69                  | Y             | Y         | N             | 45,X/46,XY (12.5%)                                                                                                                                                                                 |
| ISP001<br>9F | Male   | 75                  | Y             | Y         | Y             | 45,X/46,XY (22.4%)                                                                                                                                                                                 |
| ISP003<br>6F | Male   | 67                  | Y             | Y         | Y             | 45,X/46,XY (19.1%)                                                                                                                                                                                 |
| IS0003<br>F  | Male   | 59                  | N             | N         | Y             | seq[GCRh37] 46,XY,t(15;22)(q24.2;q13.1),<br>der(15)(15pter->15q24.2(76,503,998)::TCACTG::22q13.1(39,580,634)->22qter),d<br>er(22)(22pter->22q13.1(39,580,63{1-2}::15q24.2(76,503,99{6-7})->15qter) |

#Y/N: The patient had or did not have this phenotype

\*Description of variants follows the International Society of Cytogenomic Nomenclature (ISCN) 2016

**eTable 6. Other CNVs and structural rearrangements detected in this cohort**

| Sample Name | Gender | Age at onset of stroke | Hypertension# | Diabetes# | Dyslipidemia# | Variants                                                                                                                                                                                                                                                    |
|-------------|--------|------------------------|---------------|-----------|---------------|-------------------------------------------------------------------------------------------------------------------------------------------------------------------------------------------------------------------------------------------------------------|
| IS0016F     | Male   | 68                     | Y             | N         | Y             | seq[GCRh37] mos del(2)(q12.2q13) chr2:g.106578814_111586107del<br>seq[GCRh37] mos del(16)(q24.2q24.3) chr16:g.88015252_89439554del                                                                                                                          |
| IS0004F     | Male   | 69                     | N             | Y         | Y             | seq[GCRh37]<br>ins(21;21)(q22.11;q22.11)(pter->q22.11(+)(31787784):TGTA::q22.11(-)(31759988)<-q22.11(-)(31748571)::q22.11(+)(31772144)->qter)<br>dup(21)(q22.11) chr21:g.31748571_31759988dup<br>dup(21)(q22.11) chr21:g.31772144_31787784dup               |
| IS0038F     | Male   | 68                     | Y             | N         | Y             | seq[GCRh37]<br>ins(14;14)(q21.3;q21.3)(pter->q21.3(+)(4850885 <sup>16</sup> ):q21.3(-)(4847995 <sup>16</sup> )<-q21.3(-)(48464141)::q21.3(+)(48483961)->qter)<br>dup(14)(q21.3) chr14:g.48464141_48479953dup<br>dup(14)(q21.3) chr14:g.48483961_48508853dup |
| IS0141B     | Male   | 48                     | N             | N         | Y             | seq[GCRh37]<br>ins(14;14)(q21.3;q21.3)(pter->q21.3(+)(4850885 <sup>16</sup> ):q21.3(-)(4847995 <sup>16</sup> )<-q21.3(-)(48464141)::q21.3(+)(48483961)->qter)<br>dup(14)(q21.3) chr14:g.48464141_48479953dup<br>dup(14)(q21.3) chr14:g.48483961_48508853dup |

#: Y/N: The patient had or did not have this phenotype

**eTable 7. Gene enrichment analysis for the candidate variants involved genes.**

| GO         | Category                | Description                                                     | Count | Log10 (P) | Log10 (q) |
|------------|-------------------------|-----------------------------------------------------------------|-------|-----------|-----------|
| GO:0030301 | GO Biological Processes | cholesterol transport                                           | 9     | -14.93    | -10.56    |
| GO:0055090 | GO Biological Processes | acylglycerol homeostasis                                        | 5     | -9.34     | -6.36     |
| M106       | Canonical Pathways      | PID HNF3B PATHWA                                                | 5     | -9.19     | -6.25     |
| GO:0001568 | GO Biological Processes | blood vessel development                                        | 10    | -8.91     | -5.99     |
| GO:0072001 | GO Biological Processes | renal system development                                        | 7     | -7.94     | -5.1      |
| GO:0090118 | GO Biological Processes | receptor-mediated endocytosis involved in cholesterol transport | 3     | -7.36     | -4.66     |
| GO:0030157 | GO Biological Processes | pancreatic juice secretion                                      | 3     | -6.76     | -4.2      |
| GO:0007369 | GO Biological Processes | gastrulation                                                    | 5     | -6.07     | -3.67     |
| GO:0071363 | GO Biological Processes | cellular response to growth factor stimulus                     | 7     | -5.53     | -3.23     |
| WP363      | WikiPathways            | Wnt signaling pathway                                           | 3     | -4.75     | -2.57     |

|            |                         |                                                           |   |       |       |
|------------|-------------------------|-----------------------------------------------------------|---|-------|-------|
| WP4239     | WikiPathways            | Epithelial to mesenchymal transition in colorectal cancer | 4 | -4.75 | -2.57 |
| hsa00561   | KEGG Pathway            | Glycerolipid metabolism                                   | 3 | -4.61 | -2.46 |
| GO:0071417 | GO Biological Processes | cellular response to organonitrogen compound              | 6 | -4.59 | -2.45 |
| GO:0019221 | GO Biological Processes | cytokine-mediated signaling pathway                       | 5 | -4.11 | -2.03 |

---

Log<sub>10</sub>(P) is the p-value in log base 10. "Log<sub>10</sub>(q)" is the multi-test adjusted p-value in log base 10.
